# Supplementary material for: Winners and losers in a world where the high seas is closed to fishing
Source: PubMed Central journal article supplement — Sci Rep. 2015 Feb 12;5:8481. doi: 10.1038/srep08481 (PMC5389130; doi:10.1038/srep08481), 2015-02-12
Supplement: srep08481-s1.pdf [file srep08481-s1.pdf]

1 **Supplementary Information**

2

3 **Manuscript title:** Winners and losers in a world where the high seas is closed to fishing

4

5 **Authors:** U. Rashid Sumaila, Vicky W.Y. Lam, Dana D. Miller, Louise Teh, Reg A. Watson,  
6 Dirk Zeller, William W.L. Cheung, Isabelle M. Côté, Alex D. Rogers, Callum Roberts, Enric  
7 Sala, Daniel Pauly

8

9 **Table 1 | Taxa caught (i) solely in the high seas; (ii) solely in Exclusive Economic Zones**  
10 **(EEZs); and (iii) in both the high seas and EEZs.**

11

12 **(i) Taxa caught solely in the high seas.\***

| Taxon Name                        | Common Name             |
|-----------------------------------|-------------------------|
| <i>Artedidraconidae</i>           | Barbled plunderfishes   |
| <i>Bathyraja maccaini</i>         | McCains skate           |
| <i>Capromimus abbreviatus</i>     | Capro dory              |
| <i>Centrolophus niger</i>         | Rudderfish              |
| <i>Chaenodraco wilsoni</i>        | Spiny icefish           |
| <i>Chionobathyscus dewitti</i>    | Chionobathyscus dewitti |
| <i>Chionodraco myersi</i>         | Chionodraco myersi      |
| <i>Chionodraco rastrispinosus</i> | Ocellated icefish       |
| <i>Cryodraco antarcticus</i>      | Long-fingered icefish   |
| <i>Cyttus traverse</i>            | King dory               |
| <i>Dissostichus</i>               | Toothfishes             |
| <i>Dissostichus mawsoni</i>       | Antarctic toothfish     |
| <i>Neocyttus rhomboidalis</i>     | Spiky oreo              |
| <i>Neopagetopsis ionah</i>        | Bible icefish           |
| <i>Notoscopelus</i>               | Lampfish                |
| <i>Paratrachichthys trailli</i>   | Sandpaper fish          |
| <i>Pleuragramma Antarctica</i>    | Antarctic silverfish    |
| <i>Pogonophryne permitini</i>     | Pogonophryne permitini  |
| <i>Trematomus eulepidotus</i>     | Blunt scalyhead         |

13

14 \* Note that there may be a few minor exceptions within this list where small quantities of listed  
15 taxa have been caught within the EEZs of remote overseas territories or at seamounts located far  
16 offshore (i.e., < 5% of total catch) but still within national EEZ boundaries. These species are  
17 listed in Table 3 and they are marked with \*.

18

19 (ii) Taxa caught solely in EEZs.

| Taxon Name                         | Common Name              | Taxon Name                      | Common Name                  |
|------------------------------------|--------------------------|---------------------------------|------------------------------|
| <i>Ablennes hians</i>              | Flat needlefish          | <i>Arripis georgianus</i>       | Australian ruff              |
| <i>Abudefduf</i>                   | Abudefduf                | <i>Arripis trutta</i>           | Eastern Australian salmon    |
| <i>Abudefduf luridus</i>           | Canary damselfish        | <i>Artemesia longinaris</i>     | Argentine stiletto shrimp    |
| <i>Abudefduf vaigiensis</i>        | Indo-Pacific sergeant    | Ascidiacea                      | Sea squirts                  |
| <i>Acanthocybium</i>               | Acanthocybium            | <i>Atheresthes stomias</i>      | Arrowtooth flounder          |
| <i>Acanthopagrus berda</i>         | Picnic seabream          | <i>Atherina boyeri</i>          | Big-scale sand smelt         |
| <i>Acanthopagrus bifasciatus</i>   | Twobar seabream          | <i>Atherina presbyter</i>       | Sand smelt                   |
| <i>Acanthopagrus latus</i>         | Yellowfin seabream       | <i>Atractoscion aequidens</i>   | Geelbeck croaker             |
| <i>Acanthopagrus schlegelii</i>    | Blackhead seabream       | <i>Atractoscion nobilis</i>     | White weakfish               |
| <i>Acanthurus</i>                  | Acanthurus               | <i>Atrobucca nibe</i>           | Blackmouth croaker           |
| <i>Acanthurus dussumieri</i>       | Eyestripe surgeonfish    | <i>Atule mate</i>               | Yellowtail scad              |
| <i>Acanthurus lineatus</i>         | Lined surgeonfish        | <i>Austroglossus microlepis</i> | West coast sole              |
| <i>Acanthurus nigricauda</i>       | Epaulette surgeonfish    | <i>Austroglossus pectoralis</i> | Mud sole                     |
| <i>Acanthurus sohal</i>            | Sohal surgeonfish        | <i>Balistes capriscus</i>       | Grey triggerfish             |
| <i>Acanthurus triostegus</i>       | Convict surgeonfish      | Balistidae                      | Triggerfishes                |
| <i>Acanthurus xantheropterus</i>   | Yellowfin xantheropterus | <i>Bathydraconidae</i>          | Antarctic dragonfishes       |
| <i>Acetes japonicas</i>            | Akiami paste shrimp      | <i>Bathyraja eatonii</i>        | Eatons skate                 |
| <i>Aequipecten opercularis</i>     | Queen scallop            | <i>Bathyraja irrasa</i>         | Kerguelen sandpaper skate    |
| <i>Albula vulpes</i>               | Bonefish                 | <i>Batrachoididae</i>           | Toadfishes                   |
| <i>Alectis alexandrines</i>        | African threadfish       | <i>Belone belone</i>            | Garfish                      |
| <i>Alosa alosa</i>                 | Allis shad               | Belonidae                       | Needlefishes                 |
| <i>Alosa immaculate</i>            | Pontic shad              | <i>Benthalbella elongata</i>    | Benthalbella elongata        |
| <i>Alosa sapidissima</i>           | American shad            | <i>Benthosema pterotum</i>      | Skinnycheek lanternfish      |
| Ambassidae                         | Asiatic glassfishes      | <i>Beryx decadactylus</i>       | Alfonsino                    |
| <i>Amblyraja hyperborean</i>       | Arctic skate             | <i>Boops boops</i>              | Bogue                        |
| <i>Ammodytes personatus</i>        | Pacific sandlance        | <i>Bothus mancus</i>            | Flowery flounder             |
| <i>Anadara</i>                     | Anadara clams            | <i>Brachydeuterus auritus</i>   | Bigeye grunt                 |
| <i>Anchoa hepsetus</i>             | Broad-striped anchovy    | <i>Bregmaceros maclellandi</i>  | Unicorn cod                  |
| <i>Anchoviella</i>                 | Anchoviella              | <i>Brevoortia aurea</i>         | Brazilian menhaden           |
| <i>Anodontostoma chacunda</i>      | Chacunda gizzard shad    | <i>Brevoortia patronus</i>      | Gulf menhaden                |
| <i>Anthias anthias</i>             | Swallowtail seaperch     | <i>Buccinum undatum</i>         | Whelk                        |
| <i>Aphareus furca</i>              | Small toothed jobfish    | <i>Caesio</i>                   | Fusiliers                    |
| <i>Apostichopus japonicus</i>      | Japanese sea cucumber    | <i>Caesio caeruleaurea</i>      | Blue and gold fusilier       |
| <i>Aprion virescens</i>            | Green jobfish            | <i>Caesio teres</i>             | Yellow and blueback fusilier |
| <i>Arca</i>                        | Ark clams                | <i>Calamus</i>                  | Porgies                      |
| <i>Archosargus probatocephalus</i> | Sheepshead               | <i>Callianassa</i>              | Ghost shrimps                |
| <i>Argentina sphyraena</i>         | Argentine                | <i>Callinectes</i>              | Blue crabs                   |
| <i>Argopecten gibbus</i>           | Calico scallop           | <i>Callinectes danae</i>        | Dana's swimming crab         |
| <i>Argopecten purpuratus</i>       | Peruvian calico scallop  | <i>Callinectes sapidus</i>      | Blue crab                    |
| <i>Argopecten ventricosus</i>      | Pacific calico scallop   | <i>Callista chione</i>          | Smooth callista              |
| <i>Argyrosomus regius</i>          | Meagre                   | <i>Callorhynchus capensis</i>   | Cape elephantfish            |
| <i>Argyrozona argyrozona</i>       | Carpenter seabream       | <i>Callorhynchus milii</i>      | Ghost shark                  |
| Ariidae                            | Sea catfishes            | <i>Cancer borealis</i>          | Jonah crab                   |
| Aristeidae                         | Aristeid shrimps         | <i>Cancer irroratus</i>         | Atlantic rock crab           |
| <i>Aristeus antennatus</i>         | Blue and red shrimp      | <i>Cancer magister</i>          | Dungeness crab               |
| <i>Aristeus varidens</i>           | Striped red shrimp       | <i>Cancer pagurus</i>           | Edible crab                  |

22 (ii) Continue

| Taxon Name                       | Common Name                 | Taxon Name                       | Common Name                     |
|----------------------------------|-----------------------------|----------------------------------|---------------------------------|
| <i>Cancer productus</i>          | Pacific rock crab           | <i>Chloroscombrus orqueta</i>    | Pacific bumper                  |
| <i>Cantherhines</i>              | Filefishes                  | <i>Chlorurus microrhinos</i>     | Steephead parrotfish            |
| <i>Capros aper</i>               | Boarfish                    | <i>Choromytilus chorus</i>       | Choro mussel                    |
| <i>Carangoides orthogrammus</i>  | Island trevally             | <i>Chromis chromis</i>           | Damselfish                      |
| <i>Caranx crysos</i>             | Blue runner                 | <i>Cilus gilberti</i>            | Corvina drum                    |
| <i>Caranx melampygus</i>         | Bluefin trevally            | <i>Cirrhitus pinnulatus</i>      | Stocky hawkfish                 |
| <i>Caranx papuensis</i>          | Brassy trevally             | <i>Citharus linguatula</i>       | Atlantic spotted flounder       |
| <i>Caranx rhonchus</i>           | False scad                  | <i>Clinocardium nuttallii</i>    | Nuttall cockle                  |
| <i>Caranx ruber</i>              | Bar jack                    | <i>Clupanodon thrissa</i>        | Chinese gizzard shad            |
| <i>Caranx sexfasciatus</i>       | Bigeye trevally             | <i>Clupeonella cultriventris</i> | Black Sea sprat                 |
| <i>Carcharhinus brachyurus</i>   | Copper shark                | <i>Conger myriaster</i>          | Whitespotted conger             |
| <i>Carcharhinus sorrah</i>       | Spottail shark              | <i>Conger oceanicus</i>          | American conger                 |
| <i>Carcinus aestuarii</i>        | Mediterranean shore crab    | <i>Conger orbignianus</i>        | Argentine conger                |
| <i>Carcinus maenas</i>           | Green crab                  | <i>Conodon nobilis</i>           | Barred grunt                    |
| <i>Cardium edule</i>             | Common edible cockle        | <i>Coregonus</i>                 | Whitefishes                     |
| <i>Caulolatilus chrypsos</i>     | Atlantic goldeye tilefish   | <i>Coregonus albula</i>          | Vendace                         |
| <i>Caulolatilus princeps</i>     | Ocean whitefish             | <i>Coregonus autumnalis</i>      | Arctic cisco                    |
| <i>Centrophorus granulosus</i>   | Gulper shark                | <i>Coregonus lavaretus</i>       | European whitefish              |
| Centropomidae                    | Snooks                      | <i>Coregonus muksun</i>          | Muksun                          |
| <i>Centropomus</i>               | Snooks                      | <i>Coregonus nasus</i>           | Broad whitefish                 |
| <i>Centropomus undecimalis</i>   | Common snook                | <i>Coregonus oxyrinchus</i>      | Houting                         |
| <i>Centropristis striata</i>     | Black seabass               | <i>Coryphaena</i>                | Coryphaena                      |
| <i>Cephalopholis fulva</i>       | Coney                       | <i>Crangon</i>                   | Sand shrimps                    |
| <i>Cephalopholis hemistiktos</i> | Yellowfin hind              | <i>Crangon crangon</i>           | Common shrimp                   |
| <i>Cephalopholis sexmaculata</i> | Sixblotch hind              | Crangonidae                      | Crangonid shrimp                |
| <i>Cephalopholis sonnerati</i>   | Tomato hind                 | <i>Crassostrea</i>               | Cupped oysters                  |
| <i>Cephalopholis urodeta</i>     | Darkfin hind                | <i>Crassostrea gigas</i>         | Pacific cupped oyster           |
| <i>Cepola macrophthalma</i>      | Red bandfish                | <i>Crassostrea iredalei</i>      | Slipper cupped oyster           |
| <i>Cervimunida johni</i>         | Carrot Squat Lobster        | <i>Crassostrea rhizophorae</i>   | Mangrove cupped oyster          |
| <i>Cetengraulis edentulous</i>   | Atlantic anchoveta          | <i>Crassostrea virginica</i>     | American cupped oyster          |
| <i>Cetengraulis mysticetus</i>   | Pacific anchoveta           | <i>Crenidens crenidens</i>       | Karenteen seabream              |
| Chaetodontidae                   | Butterflyfishes             | <i>Cromileptes altivelis</i>     | Humpback grouper                |
| <i>Channichthys rhinoceratus</i> | Unicorn icefish             | <i>Ctenochaetus striatus</i>     | Striated surgeonfish            |
| <i>Charybdis</i>                 | Indo-Pacific swimming crabs | <i>Ctenolabrus rupestris</i>     | Goldsinny-wrasse                |
| <i>Cheilinus</i>                 | Cheilinus                   | <i>Cyclopterus lumpus</i>        | Lumpsucker                      |
| <i>Cheimerius nufar</i>          | Santer seabream             | <i>Cymbium</i>                   | Gondolas                        |
| <i>Chelidonichthys capensis</i>  | Cape gurnard                | <i>Cynoscion</i>                 | Weakfishes                      |
| <i>Chelidonichthys kumu</i>      | Bluefin gurnard             | <i>Cynoscion analis</i>          | Peruvian weakfish               |
| <i>Chelidonichthys lucerna</i>   | Tub gurnard                 | <i>Cynoscion nebulosus</i>       | Spotted weakfish                |
| <i>Chelon labrosus</i>           | Thicklip grey mullet        | <i>Cynoscion striatus</i>        | South American striped weakfish |
| <i>Chione stutchburyi</i>        | Stutchbury's venus          | <i>Dasyatis</i>                  | Stingrays                       |
| <i>Chirocentrus</i>              | Wolf herring                | <i>Dasyatis akajei</i>           | Red stingray                    |
| <i>Chirocentrus dorab</i>        | Dorab wolf-herring          | <i>Dasyatis centroura</i>        | Roughtail stingray              |
| <i>Chirocentrus nudus</i>        | Whitefin wolf-herring       | <i>Dasyatis pastinaca</i>        | Common stingray                 |
| <i>Chlamys delicatula</i>        | Delicate scallop            | <i>Decapterus macrosoma</i>      | Shortfin scad                   |
| <i>Chloroscombrus chrysurus</i>  | Atlantic bumper             | <i>Decapterus maruadsi</i>       | Japanese scad                   |

23  
24

25 (ii) Continue

| Taxon Name                          | Common Name                         | Taxon Name                            | Common Name                  |
|-------------------------------------|-------------------------------------|---------------------------------------|------------------------------|
| <i>Dentex angolensis</i>            | Angola dentex                       | <i>Epinephelus goreensis</i>          | Dungat grouper               |
| <i>Dentex congoensis</i>            | Congo dentex                        | <i>Epinephelus guttatus</i>           | Red hind                     |
| <i>Dentex dentex</i>                | Common dentex                       | <i>Epinephelus hexagonatus</i>        | Starspotted grouper          |
| <i>Dentex maroccanus</i>            | Morocco dentex                      | <i>Epinephelus howlandi</i>           | Blacksaddle grouper          |
| <i>Diagramma picta</i>              | Painted sweetlips                   | <i>Epinephelus lanceolatus</i>        | Giant grouper                |
| <i>Diapterus rhombeus</i>           | Caitipa mojarra                     | <i>Epinephelus morio</i>              | Red grouper                  |
| <i>Dicentrarchus labrax</i>         | European seabass                    | <i>Epinephelus multinotatus</i>       | White-blotched grouper       |
| <i>Dicentrarchus punctatus</i>      | Spotted seabass                     | <i>Epinephelus socialis</i>           | Surge grouper                |
| <i>Dicologlossa cuneata</i>         | Wedge sole                          | <i>Epinephelus striatus</i>           | Nassau grouper               |
| <i>Diodon</i>                       | Diodon                              | <i>Epinephelus summana</i>            | Summan grouper               |
| <i>Diplectrum formosum</i>          | Sand seabass                        | <i>Erimacrus isenbeckii</i>           | Hair Crab                    |
| <i>Diplodus</i>                     | Seabreams and porgies               | <i>Etelis carbunculus</i>             | Ruby snapper                 |
| <i>Diplodus annularis</i>           | Annular seabream                    | <i>Etelis coruscans</i>               | Flame snapper                |
| <i>Diplodus argenteus argenteus</i> | South American silver porgy         | <i>Etelis oculatus</i>                | Queen snapper                |
| <i>Diplodus puntazzo</i>            | Sharpsnout seabream                 | <i>Ethmalosa fimbriata</i>            | Bonga shad                   |
| <i>Diplodus sargus sargus</i>       | White seabream                      | <i>Ethmidium maculatum</i>            | Pacific menhaden             |
| <i>Diplodus vulgaris</i>            | Common two-banded seabream          | <i>Etmopterus spinax</i>              | Velvet belly                 |
| <i>Dipturus lineus</i>              | Sailray                             | <i>Etrumeus teres</i>                 | Red-eye round herring        |
| <i>Donax</i>                        | Donax clams                         | <i>Etrumeus whiteheadi</i>            | Whiteheads round herring     |
| <i>Dussumieria acuta</i>            | Rainbow sardine                     | <i>Eucinostomus</i>                   | Eucinostomus                 |
| <i>Echinorhinus brucus</i>          | Bramble shark                       | <i>Euphausia</i>                      | Euphausia                    |
| <i>Echinus esculentus</i>           | European edible sea urchin          | <i>Farfantepenaeus aztecus</i>        | Northern brown shrimp        |
| <i>Eledone</i>                      | Horned and musky octopuses          | <i>Farfantepenaeus brasiliensis</i>   | Redspotted shrimp            |
| <i>Eledone cirrhosa</i>             | Horned octopus                      | <i>Farfantepenaeus brevirostris</i>   | Crystal shrimp               |
| <i>Eleginops maclovinus</i>         | Patagonian blennie                  | <i>Farfantepenaeus californiensis</i> | Yellowleg shrimp             |
| <i>Eleginus gracilis</i>            | Saffron cod                         | <i>Farfantepenaeus duorarum</i>       | Northern pink shrimp         |
| <i>Eleginus nawaga</i>              | Navaga                              | <i>Farfantepenaeus notialis</i>       | Southern pink shrimp         |
| <i>Eleutheronema tetradactylum</i>  | Fourfinger threadfin                | <i>Farfantepenaeus paulensis</i>      | Sao Paulo shrimp             |
| <i>Elops lacerta</i>                | West African ladyfish               | <i>Fenneropenaeus chinensis</i>       | Fleshy prawn                 |
| <i>Elops saurus</i>                 | Ladyfish                            | <i>Fenneropenaeus merguensis</i>      | Banana prawn                 |
| <i>Enchelyopus cimbrius</i>         | Fourbeard rockling                  | <i>Fistularia corneta</i>             | Pacific cornetfish           |
| <i>Encrasicholina heteroloba</i>    | Shorthead anchovy                   | <i>Fistularia tabacaria</i>           | Cornet fish                  |
| <i>Engraulis capensis</i>           | Cape anchovy                        | Flounders or halibuts and soles       | Flounders halibuts and soles |
| <i>Engraulis encrasicolus</i>       | European anchovy                    | Gadidae                               | Cods and haddocks            |
| <i>Engraulis japonicas</i>          | Japanese anchovy                    | <i>Gadus ogac</i>                     | Greenland cod                |
| <i>Engraulis mordax</i>             | Californian anchovy                 | <i>Galeoides decadactylus</i>         | Lesser African threadfin     |
| <i>Engraulis ringens</i>            | Anchoveta                           | <i>Galeus melastomus</i>              | Blackmouth catshark          |
| <i>Ensis directus</i>               | Atlantic razor clam                 | Gastropoda                            | Gastropods                   |
| <i>Ensis ensis</i>                  | Pod razor                           | <i>Gazza minuta</i>                   | Toothpony                    |
| <i>Eopsetta jordani</i>             | Petrale sole                        | <i>Genyonemus lineatus</i>            | White croaker                |
| Ephippidae                          | Spadefishes and batfishes and scats | <i>Genypterus capensis</i>            | Kingklip                     |
| <i>Epinephelus</i>                  | Groupers                            | <i>Genypterus maculatus</i>           | Black cusk-eel               |
| <i>Epinephelus aeneus</i>           | White grouper                       | <i>Gerres nigri</i>                   | Guinean striped mojarra      |
| <i>Epinephelus analogus</i>         | Spotted grouper                     | <i>Gerres oblongus</i>                | Slender silverbidy           |
| <i>Epinephelus areolatus</i>        | Areolate grouper                    | <i>Gerres oyena</i>                   | Common silver-biddy          |
| <i>Epinephelus coioides</i>         | Orange-spotted grouper              | <i>Ginglymostoma cirratum</i>         | Nurse shark                  |

26  
27

28 (ii) Continue

| Taxon Name                             | Common Name                          | Taxon Name                        | Common Name                     |
|----------------------------------------|--------------------------------------|-----------------------------------|---------------------------------|
| <i>Girella nigricans</i>               | Opaleye                              | Inermiidae                        | Bonnetmouths                    |
| <i>Girella tricuspidata</i>            | Luderick                             | <i>Isurus paucus</i>              | Longfin mako                    |
| <i>Glycymeris glycymeris</i>           | Dog cockle                           | <i>Jasus edwardsii</i>            | Red rock lobster                |
| <i>Glyptocephalus zachirus</i>         | Rex sole                             | <i>Jasus frontalis</i>            | Juan Fernandez rock lobster     |
| <i>Gnathanodon speciosus</i>           | Golden trevally                      | <i>Jasus lalandii</i>             | Cape rock lobster               |
| <i>Gnathodentex aureolineatus</i>      | Striped large-eye bream              | <i>Jasus novaehollandiae</i>      | Southern rock lobster           |
| Gobiidae                               | Gobies                               | <i>Konosirus punctatus</i>        | Konoshiro gizzard shad          |
| <i>Gobionotothen acuta</i>             | Triangular notothen                  | <i>Kuhlia mugil</i>               | Barred flagtail                 |
| <i>Gobius niger</i>                    | Black goby                           | <i>Labrus bergylta</i>            | Ballan wrasse                   |
| <i>Grammatorcynus bilineatus</i>       | Double-lined mackerel                | <i>Lactarius lactarius</i>        | False trevally                  |
| <i>Grammolites suppositus</i>          | Spotfin flathead                     | Lamniformes                       | Mackerel sharks                 |
| <i>Gymnura altavela</i>                | Spiny butterfly ray                  | <i>Larimichthys crocea</i>        | Large yellow croaker            |
| <i>Haliotis</i>                        | Abalones                             | <i>Larimichthys polyactis</i>     | Yellow croaker                  |
| <i>Haliotis gigantean</i>              | Giant abalone                        | <i>Lateolabrax japonicus</i>      | Japanese seaperch               |
| <i>Haliotis midae</i>                  | Perlemoen abalone                    | <i>Lates calcarifer</i>           | Barramundi                      |
| <i>Haliotis rubra</i>                  | Blacklip abalone                     | Latridae                          | Trumpeters                      |
| <i>Haliotis tuberculata</i>            | Tuberculate abalone                  | Leiognathidae                     | Slimys slipmouths or ponyfishes |
| <i>Haliporoides triarthrus</i>         | Knife shrimp                         | <i>Leiognathus</i>                | Slipmouths                      |
| <i>Halobatrachus didactylus</i>        | Lusitanian toadfish                  | <i>Leiostomus xanthurus</i>       | Spot croaker                    |
| <i>Harpadon nehereus</i>               | Bombay duck                          | <i>Lepidonotothen mizops</i>      | Toad notothen                   |
| Hemiramphidae                          | Halfbeaks                            | <i>Lepidoperca pulchella</i>      | Orange perch                    |
| <i>Hemiramphus</i>                     | Halfbeaks                            | <i>Lepidorhombus whiffiagonis</i> | Megrim                          |
| <i>Hemiramphus brasiliensis</i>        | Ballyhoo                             | <i>Lepidotrigla cavillone</i>     | Large-scaled gurnard            |
| <i>Herklotsichthys quadrimaculatus</i> | Bluestripe herring                   | <i>Lepophidium brevibarbe</i>     | Shortbeard cusk-eel             |
| <i>Heterocarpus reedi</i>              | Chilean nylon shrimp                 | Lethrinidae                       | Emperors or scavengers          |
| <i>Heterocarpus vicarius</i>           | Northern nylon shrimp                | <i>Lethrinus atkinsoni</i>        | Pacific yellowtail emperor      |
| <i>Heteropriacanthus cruentatus</i>    | Glasseye                             | <i>Lethrinus atlanticus</i>       | Atlantic emperor                |
| <i>Hilsa kelee</i>                     | Kelee shad                           | <i>Lethrinus borbonicus</i>       | Snubnose emperor                |
| <i>Himantura gerrardi</i>              | Sharpnose stingray                   | <i>Lethrinus harak</i>            | Thumbprint emperor              |
| <i>Hippocampus</i>                     | Hippocampus                          | <i>Lethrinus lentjan</i>          | Pink ear emperor                |
| <i>Hippoglossoides elassodon</i>       | Flathead sole                        | <i>Lethrinus nebulosus</i>        | Spangled emperor                |
| <i>Hippoglossus stenolepis</i>         | Pacific halibut                      | <i>Lethrinus olivaceus</i>        | Longface emperor                |
| Holocentridae                          | Squirrelfishes and soldierfishes     | <i>Lethrinus xanthochilus</i>     | Yellowlip emperor               |
| Holocephali                            | Chimaeras and ratfish and rabbitfish | <i>Leucoraja fullonica</i>        | Shagreen ray                    |
| <i>Homarus americanus</i>              | American lobster                     | <i>Leucoraja naevus</i>           | Cuckoo ray                      |
| <i>Homarus gammarus</i>                | European lobster                     | <i>Lichia amia</i>                | Leerfish                        |
| <i>Hydrolagus colliei</i>              | Spotted ratfish                      | <i>Limanda aspera</i>             | Yellowfin sole                  |
| <i>Hydrolagus mirabilis</i>            | Large-eyed rabbitfish                | <i>Limulus polyphemus</i>         | Horseshoe crab                  |
| <i>Hypoptychus dybowskii</i>           | Korean sandeel                       | <i>Liocarcinus depurator</i>      | Blue-leg swimcrab               |
| <i>Hyporhamphus sajori</i>             | Japanese halfbeak                    | <i>Lithodes aequispinus</i>       | Same-spine stone crab           |
| <i>Hyporthodus flavolimbatus</i>       | Yellowedge grouper                   | <i>Lithodes maia</i>              | Stone king crab                 |
| <i>Hyporthodus nigritus</i>            | Warsaw grouper                       | <i>Lithognathus</i>               | Steenbras                       |
| <i>Hyporthodus niveatus</i>            | Snowy grouper                        | <i>Lithognathus mormyrus</i>      | Sand steenbras                  |
| <i>Ibacus ciliates</i>                 | Sand Crayfish                        | <i>Litopenaeus occidentalis</i>   | Western white shrimp            |
| <i>Ilisha Africana</i>                 | West African ilisha                  | <i>Litopenaeus setiferus</i>      | Northern white shrimp           |
| <i>Ilisha elongate</i>                 | Elongate ilisha                      | <i>Litopenaeus stylirostris</i>   | Blue shrimp                     |

29  
30

## 31 (ii) Continue

| Taxon Name                       | Common Name               | Taxon Name                      | Common Name                  |
|----------------------------------|---------------------------|---------------------------------|------------------------------|
| <i>Litopenaeus vannamei</i>      | Whiteleg shrimp           | <i>Metapenaeus monoceros</i>    | Speckled shrimp              |
| <i>Littorina littorea</i>        | Common periwinkle         | <i>Meuschenia scaber</i>        | Velvet leatherjacket         |
| <i>Liza aurata</i>               | Golden grey mullet        | <i>Microcosmus sulcatus</i>     | Grooved sea squirt           |
| <i>Liza haematocheilus</i>       | So-iny mullet             | <i>Microgadus proximus</i>      | Pacific tomcod               |
| <i>Liza klunzingeri</i>          | Klunzingers mullet        | <i>Microgadus tomcod</i>        | Atlantic tomcod              |
| <i>Liza saliens</i>              | Leaping mullet            | <i>Micropogonias</i>            | Western croakers             |
| <i>Loligo vulgaris</i>           | European squid            | <i>Micropogonias furnieri</i>   | Whitemouth croaker           |
| <i>Lophius piscatorius</i>       | Angler                    | <i>Micropogonias undulatus</i>  | Atlantic croaker             |
| <i>Lophius vaillanti</i>         | Shortspine African angler | <i>Microstomus pacificus</i>    | Dover sole                   |
| <i>Loxechinus albus</i>          | Chilean sea urchin        | <i>Miichthys miiuy</i>          | Mi-iuy croaker               |
| <i>Lutjanus argentiventris</i>   | Yellow snapper            | <i>Mimachlamys varia</i>        | Variiegated scallop          |
| <i>Lutjanus campechanus</i>      | Northern red snapper      | Miscellaneous diadromous fishes | Diadromous fishes            |
| <i>Lutjanus fulvus</i>           | Blacktail snapper         | <i>Mobula mobular</i>           | Devil fish                   |
| <i>Lutjanus guttatus</i>         | Spotted rose snapper      | <i>Modiolus</i>                 | Horse mussels                |
| <i>Lutjanus johnii</i>           | Johns snapper             | Monacanthidae                   | Filefishes                   |
| <i>Lutjanus malabaricus</i>      | Malabar blood snapper     | <i>Morone americana</i>         | White perch                  |
| <i>Lutjanus monostigma</i>       | Onespot snapper           | <i>Morone saxatilis</i>         | Striped sea-bass             |
| <i>Lutjanus purpureus</i>        | Southern red snapper      | <i>Mugil</i>                    | Grey mullets                 |
| <i>Lutjanus vivanus</i>          | Silk snapper              | <i>Mugil cephalus</i>           | Flathead grey mullet         |
| <i>Macolor</i>                   | Macolor                   | <i>Mugil liza</i>               | Liza                         |
| <i>Macolor niger</i>             | Black and white snapper   | <i>Mugil soiyu</i>              | So-iuy mullet                |
| <i>Macrodon ancylodon</i>        | King weakfish             | <i>Mullus argentinae</i>        | Argentine goatfish           |
| <i>Mactra sachalinensis</i>      | Hen clam                  | <i>Mullus barbatus barbatus</i> | Red mullet                   |
| <i>Maja squinado</i>             | Spinous spider crab       | <i>Mullus surmuletus</i>        | Surmullet                    |
| <i>Marsupenaeus japonicus</i>    | Kuruma prawn              | <i>Muraena helena</i>           | Mediterranean moray          |
| <i>Megabalanus psittacus</i>     | Giant barnacle            | <i>Muraenesox cinereus</i>      | Daggertooth pike conger      |
| <i>Megalaspis cordyla</i>        | Torpedo scad              | Muraenidae                      | Moray eels                   |
| <i>Megalops atlanticus</i>       | Tarpon                    | <i>Murex</i>                    | Murex shells                 |
| <i>Meganyctiphanes norvegica</i> | Norwegian krill           | <i>Mustelus asterias</i>        | Starry smooth-hound          |
| <i>Melicertus kerathurus</i>     | Caramote prawn            | <i>Mustelus henlei</i>          | Brown smooth-hound           |
| <i>Melicertus latisulcatus</i>   | Western king prawn        | <i>Mustelus lenticulatus</i>    | Spotted estuary smooth-hound |
| <i>Mene maculate</i>             | Moonfish                  | <i>Mustelus mustelus</i>        | Smooth-hound                 |
| <i>Menippe mercenaria</i>        | Black stone crab          | <i>Mustelus schmitti</i>        | Narrownose smooth-hound      |
| <i>Menticirrhus littoralis</i>   | Gulf kingcroaker          | <i>Mya arenaria</i>             | Sand gaper                   |
| <i>Menticirrhus saxatilis</i>    | Northern kingcroaker      | <i>Mycteroperca bonaci</i>      | Black grouper                |
| <i>Meretrix</i>                  | Hard clams                | <i>Mycteroperca microlepis</i>  | Gag                          |
| <i>Meretrix lusoria</i>          | Japanese hard clam        | <i>Mycteroperca phenax</i>      | Scamp                        |
| <i>Merluccius angustimanus</i>   | Panama hake               | <i>Mycteroperca venenosa</i>    | Yellowfin grouper            |
| <i>Merluccius capensis</i>       | Shallow-water Cape hake   | <i>Mycteroperca xenarcha</i>    | Broomtail grouper            |
| <i>Merluccius gayi peruanus</i>  | Peruvian hake             | <i>Myliobatis aquila</i>        | Common eagle ray             |
| <i>Merluccius polli</i>          | Benguela hake             | <i>Myripristis</i>              | Myripristis                  |
| <i>Merluccius senegalensis</i>   | Senegalese hake           | <i>Myripristis adusta</i>       | Shadowfin soldierfish        |
| <i>Mesodesma donacium</i>        | Macha clam                | <i>Myripristis amaena</i>       | Brick soldierfish            |
| <i>Metapenaeus</i>               | Metapenaeus shrimps       | <i>Myripristis kuntee</i>       | Shoulderbar soldierfish      |
| <i>Metapenaeus endeavouri</i>    | Endeavour shrimp          | <i>Myripristis violacea</i>     | Lattice soldierfish          |
| <i>Metapenaeus joyneri</i>       | Shiba shrimp              | <i>Myripristis woodsi</i>       | Whitespot soldierfish        |

32  
33

34 (ii) Continue

| Taxon Name                       | Common Name                       | Taxon Name                         | Common Name                    |
|----------------------------------|-----------------------------------|------------------------------------|--------------------------------|
| <i>Mytilus chilensis</i>         | Chilean mussel                    | <i>Pagrus</i>                      | Seabreams ( <i>Pagrus</i> spp) |
| <i>Mytilus coruscus</i>          | Korean mussel                     | <i>Pagrus auratus</i>              | Squirefish                     |
| <i>Mytilus galloprovincialis</i> | Mediterranean mussel              | <i>Pagrus auriga</i>               | Redbanded seabream             |
| <i>Mytilus planulatus</i>        | Australian mussel                 | <i>Pagrus caeruleostictus</i>      | Bluespotted seabream           |
| <i>Mytilus platensis</i>         | River Plata mussel                | <i>Palaemon longirostris</i>       | Delta prawn                    |
| <i>Myxine glutinosa</i>          | Hagfish                           | <i>Palaemon serratus</i>           | Common prawn                   |
| <i>Naso</i>                      | Naso                              | Palaemonidae                       | Palaemonid shrimps             |
| <i>Naso annulatus</i>            | Whitemargin unicornfish           | Palinuridae                        | Spiny lobsters                 |
| <i>Naso caesius</i>              | Gray unicornfish                  | <i>Palinurus</i>                   | Spiny lobsters                 |
| <i>Naso hexacanthus</i>          | Sleek unicornfish                 | <i>Palinurus delagoae</i>          | Natal spiny lobster            |
| <i>Naso lituratus</i>            | Orangespine unicornfish           | <i>Palinurus elephas</i>           | Common spiny lobster           |
| <i>Naso vlamingii</i>            | Bignose unicornfish               | <i>Palinurus gilchristi</i>        | Southern spiny lobster         |
| <i>Necora puber</i>              | Velvet swimcrab                   | <i>Palinurus mauritanicus</i>      | Pink spiny lobster             |
| <i>Nemadactylus macropterus</i>  | Tarakihi                          | <i>Pampus</i>                      | Silver pomfrets                |
| <i>Nematalosa nasus</i>          | Blochs gizzard shad               | <i>Pampus argenteus</i>            | Silver pomfret                 |
| <i>Nematopalaemon schmitti</i>   | Whitebelly prawn                  | <i>Pampus chinensis</i>            | Chinese silver pomfret         |
| <i>Nemipterus</i>                | Threadfin breams                  | Pandalidae                         | Norther shrimps                |
| <i>Nemipterus japonicus</i>      | Japanese threadfin bream          | <i>Pandalus hypsinotus</i>         | Coonstriped shrimp             |
| <i>Nemipterus virgatus</i>       | Golden threadfin bream            | <i>Pandalus kessleri</i>           | Grass shrimp                   |
| <i>Neoniphon opercularis</i>     | Black squirrelfish                | <i>Pandalus montagui</i>           | Aesop shrimp                   |
| <i>Nibeia mitsukurii</i>         | Honnibe croaker                   | <i>Panopea abrupta</i>             | Pacific geoduck                |
| <i>Normanichthys crockery</i>    | Normans camote                    | <i>Panulirus</i>                   | Tropical spiny lobsters        |
| <i>Notorynchus cepedianus</i>    | Broadnose sevengill shark         | <i>Panulirus cygnus</i>            | Australian spiny lobster       |
| <i>Oblada melanura</i>           | Saddled seabream                  | <i>Panulirus gracilis</i>          | Blue spiny lobster             |
| Octopodidae                      | Octopuses                         | <i>Panulirus homarus</i>           | Scalloped spiny lobster        |
| <i>Octopus</i>                   | Octopuses                         | <i>Panulirus longipes</i>          | Longlegged spiny lobster       |
| <i>Octopus vulgaris</i>          | Common octopus                    | <i>Paphies australis</i>           | Pipi wedge clam                |
| <i>Ocyurus chrysurus</i>         | Yellowtail snapper                | <i>Paracaesio stonei</i>           | Cocoa snapper                  |
| <i>Ommastrephes bartramii</i>    | Neon flying squid                 | <i>Paracentrotus lividus</i>       | Stony sea urchin               |
| <i>Oncorhynchus kisutch</i>      | Coho salmon                       | <i>Paralichthys californicus</i>   | California flounder            |
| <i>Oncorhynchus mykiss</i>       | Rainbow trout                     | <i>Paralichthys dentatus</i>       | Summer flounder                |
| Ophidiidae                       | Cusk-eels                         | <i>Paralichthys olivaceus</i>      | Bastard halibut                |
| <i>Ophiodon elongates</i>        | Lingcod                           | <i>Paralithodes brevipes</i>       | Spiny king crab                |
| <i>Opisthonema libertate</i>     | Pacific thread herring            | <i>Paralithodes platypus</i>       | Blue King Crab                 |
| <i>Orthopristis chrysoptera</i>  | Pigfish                           | <i>Paralomis granulosa</i>         | Softshell red crab             |
| <i>Osmerus eperlanus</i>         | European smelt                    | <i>Paralomis spinosissima</i>      | Antarctic stone crab           |
| Ostraciidae                      | Boxfishes (cowfish and trunkfish) | <i>Paralonchurus peruanus</i>      | Peruvian banded croaker        |
| <i>Ostrea</i>                    | Flat oysters                      | <i>Parapenaeopsis</i>              | Shrimps                        |
| <i>Ostrea chilensis</i>          | Chilean flat oyster               | <i>Parapenaeopsis atlantica</i>    | Guinea shrimp                  |
| <i>Ostrea edulis</i>             | European flat oyster              | <i>Parapercis colias</i>           | New Zealand blue cod           |
| <i>Ostrea lurida</i>             | Olympia flat oyster               | <i>Parapristipoma octolineatum</i> | African striped grunt          |
| <i>Ostrea lutaria</i>            | New Zealand dredge oyster         | <i>Parastromateus niger</i>        | Black pomfret                  |
| <i>Otolithes ruber</i>           | Tiger-toothed croaker             | <i>Parona signata</i>              | Parona leatherjacket           |
| <i>Oxynotus centrina</i>         | Angular roughshark                | <i>Parophrys vetulus</i>           | English sole                   |
| <i>Pagellus bellottii</i>        | Red pandora                       | <i>Parupeneus indicus</i>          | Indian goatfish                |
| <i>Pagellus bogaraveo</i>        | Blackspot seabream                | <i>Patella</i>                     | Limpets                        |

35  
36

37 (ii) Continue

| Taxon Name                          | Common Name                 | Taxon Name                             | Common Name             |
|-------------------------------------|-----------------------------|----------------------------------------|-------------------------|
| <i>Patinopecten caurinus</i>        | Weathervane scallop         | Pomacanthidae                          | Angelfishes             |
| <i>Pecten jacobaeus</i>             | Great Mediterranean scallop | Pomacentridae                          | Damselfishes            |
| <i>Pecten maximus</i>               | Great Atlantic scallop      | <i>Pomadasys argenteus</i>             | Silver grunt            |
| <i>Pecten novaezelandiae</i>        | New Zealand scallop         | <i>Pomadasys incisus</i>               | Bastard grunt           |
| <i>Pecten yessoensis</i>            | Yesso scallop               | <i>Pomadasys jubelini</i>              | Sompat grunt            |
| <i>Pegusa lascaris</i>              | Sand sole                   | <i>Pomadasys kaakan</i>                | Javelin grunter         |
| <i>Pelates quadrilineatus</i>       | Fourlined terapon           | <i>Pomadasys stridens</i>              | Striped piggy           |
| <i>Pellona ditchela</i>             | Indian pellona              | <i>Pontinus kuhlii</i>                 | Offshore rockfish       |
| Pempheridae                         | Sweepers                    | Portunidae                             | Swimming crabs          |
| Penaeidae                           | Penaeid shrimps             | <i>Portunus</i>                        | Swims crabs             |
| <i>Penaeus monodon</i>              | Giant tiger prawn           | <i>Portunus pelagicus</i>              | Blue swimming crab      |
| <i>Penaeus penicillatus</i>         | Redtail prawn               | <i>Portunus trituberculatus</i>        | Gazami crab             |
| <i>Pennahia anea</i>                | Bigeye croaker              | <i>Priacanthus macracanthus</i>        | Red bigeye              |
| <i>Pennahia argentata</i>           | Silver croaker              | Pristidae                              | Sawfishes               |
| <i>Pentaceros decacanthus</i>       | Bigspined boarfish          | <i>Pristiophorus</i>                   | Sawsharks               |
| <i>Pentanemus quinquarius</i>       | Royal threadfin             | <i>Pristipomoides</i>                  |                         |
| <i>Percophis brasiliensis</i>       | Brazilian flathead          | <i>argyrogrammicus</i>                 | Ornate jobfish          |
| <i>Perna perna</i>                  | South American rock mussel  | <i>Pristipomoides auricilla</i>        | Goldflag jobfish        |
| <i>Perna viridis</i>                | Brown mussel                | <i>Pristipomoides filamentosus</i>     | Crimson jobfish         |
| <i>Petromyzon marinus</i>           | Sea lamprey                 | <i>Pristipomoides zonatus</i>          | Oblique-banded snapper  |
| <i>Petrus rupestris</i>             | Red steenbras               | <i>Protothaca staminea</i>             | Pacific littleneck clam |
| <i>Pharus legume</i>                | Bean solen                  | <i>Protothaca thaca</i>                | Taca clam               |
| <i>Phycis blennoides</i>            | Greater forkbeard           | <i>Psettichthys melanostictus</i>      | West American sand sole |
| <i>Phycis phycis</i>                | Forkbeard                   | <i>Psettodes belcheri</i>              | Spottail spiny turbot   |
| <i>Pitar rostratus</i>              | Rostrate pitar              | <i>Pseudocaranx dentex</i>             | White trevally          |
| <i>Platax</i>                       | Batfishes                   | <i>Pseudoperca semifasciata</i>        | Argentinian sandperch   |
| <i>Platichthys stellatus</i>        | Starry flounder             | <i>Pseudopleuronectes americanus</i>   | Winter flounder         |
| Platycephalidae                     | Flatheads                   | <i>Pseudopleuronectes herzensteini</i> | Yellow striped flounder |
| <i>Platycephalus indicus</i>        | Bartail flathead            | <i>Pseudotolithus</i>                  | Croakers                |
| <i>Plectorhinchus gaterinus</i>     | Blackspotted rubberlips     | <i>Pseudotolithus elongatus</i>        | Bobo croaker            |
| <i>Plectorhinchus macrolepis</i>    | Biglip grunt                | <i>Pseudotolithus senegalensis</i>     | Cassava croaker         |
| <i>Plectorhinchus mediterraneus</i> | Rubberlip grunt             | <i>Pseudotolithus senegallus</i>       | Law croaker             |
| <i>Plectorhinchus orientalis</i>    | Oriental sweetlips          | <i>Pseudupeneus prayensis</i>          | West African goatfish   |
| <i>Plectorhinchus picus</i>         | Painted sweetlip            | <i>Pterocaesio marri</i>               | Marr's fusilier         |
| <i>Pleoticus muelleri</i>           | Argentine red shrimp        | <i>Pterocaesio tile</i>                | Dark-banded fusilier    |
| <i>Pleoticus robustus</i>           | Royal red shrimp            | <i>Pterogymnus laniarius</i>           | Panga seabream          |
| <i>Pleurogrammus azonus</i>         | Okhostk atka mackerel       | <i>Pteroscion peli</i>                 | Boe drum                |
| <i>Pleuroncodes monodon</i>         | Squat Lobster               | <i>Pterygotrigla polyommata</i>        | Latchet                 |
| <i>Pleuroncodes planipes</i>        | Pelagic red crab            | <i>Pyura chilensis</i>                 | Red sea squirt          |
| <i>Pleuronichthys decurrens</i>     | Curlfin sole                | <i>Raja asterias</i>                   | Starry ray              |
| <i>Pogonias cromis</i>              | Black drum                  | <i>Raja brachyura</i>                  | Blonde ray              |
| <i>Pollicipes pollicipes</i>        | Barnacle                    | <i>Raja microocellata</i>              | Small-eyed ray          |
| <i>Polydactylus quadrifilis</i>     | Giant African threadfin     | <i>Raja montagui</i>                   | Spotted ray             |
| <i>Polydactylus sexfilis</i>        | Sixfinger threadfin         | <i>Raja undulata</i>                   | Undulate ray            |
| Polynemidae                         | Threadfins                  | <i>Rapana</i>                          | Sea snails              |
| <i>Polyprion oxygeneios</i>         | Hapuka                      | <i>Rastrelliger</i>                    | Indo-Pacific mackerels  |
|                                     |                             | <i>Rastrelliger kanagurta</i>          | Indian mackerel         |

38  
39



40 (ii) Continue

| Taxon Name                         | Common Name                    | Taxon Name                        | Common Name                   |
|------------------------------------|--------------------------------|-----------------------------------|-------------------------------|
| <i>Rhabdosargus haffara</i>        | Haffara seabream               | <i>Scomberomorus guttatus</i>     | Indo-Pacific king mackerel    |
| Rhinobatidae                       | Guitarfishes                   | <i>Scomberomorus lineolatus</i>   | Streaked seerfish             |
| <i>Rhinobatos</i>                  | Guitarfish                     | <i>Scomberomorus niphonius</i>    | Japanese Spanish mackerel     |
| <i>Rhinobatos percellens</i>       | Chola guitarfish               | <i>Scomberomorus regalis</i>      | Cero                          |
| <i>Rhinobatos planiceps</i>        | Pacific guitarfish             | <i>Scomberomorus sierra</i>       | Pacific sierra                |
| <i>Rhomboplites aurorubens</i>     | Vermilion snapper              | <i>Scomberomorus tritor</i>       | West African Spanish mackerel |
| <i>Rhynchobatus australiae</i>     | White-spotted shovelnose ray   | <i>Scophthalmus aquosus</i>       | Windowpane                    |
| <i>Rhynchobatus djiddensis</i>     | Giant guitarfish               | <i>Scophthalmus maximus</i>       | Turbot                        |
| <i>Ruditapes decussatus</i>        | Grooved carpet shell           | <i>Scophthalmus rhombus</i>       | Brill                         |
| <i>Ruditapes philippinarum</i>     | Japanese carpet shell          | <i>Scorpaena porcus</i>           | Black scorpionfish            |
| <i>Sagmariasus verreauxi</i>       | Green rock lobster             | <i>Scorpaenichthys marmoratus</i> | Cabazon                       |
| <i>Salmo</i>                       | Salmon and trout               | <i>Scyliorhinus canicula</i>      | Smallspotted catshark         |
| <i>Salmo trutta trutta</i>         | Sea trout                      | <i>Scyliorhinus stellaris</i>     | Nursehound                    |
| <i>Salvelinus alpinus alpinus</i>  | Arctic char                    | <i>Scylla serrata</i>             | Indo-Pacific swamp crab       |
| <i>Salvelinus malma malma</i>      | Dolly varden                   | <i>Scyllarides latus</i>          | Mediterranean slipper lobster |
| <i>Sarda chiliensis chiliensis</i> | Eastern Pacific bonito         | <i>Sebastes alutus</i>            | Pacific ocean perch           |
| <i>Sarda chiliensis lineolata</i>  | Pacific bonito                 | <i>Sebastes goodei</i>            | Chilipepper rockfish          |
| <i>Sarda orientalis</i>            | Striped bonito                 | <i>Sebastes melanops</i>          | Black rockfish                |
| <i>Sardinella gibbosa</i>          | Goldstripe sardinella          | <i>Sebastes paucispinis</i>       | Bocaccio rockfish             |
| <i>Sardinella janeiro</i>          | Brazilian sardinella           | <i>Sebastes pinniger</i>          | Canary rockfish               |
| <i>Sardinella lemuru</i>           | Bali sardinella                | <i>Sebastes viviparus</i>         | Norway redfish                |
| <i>Sardinella longiceps</i>        | Indian oil sardine             | <i>Selaroides leptolepis</i>      | Yellowstripe scad             |
| <i>Sardinella maderensis</i>       | Madeiran sardinella            | <i>Selene dorsalis</i>            | African moonfish              |
| <i>Sardinella zunasi</i>           | Japanese sardinella            | <i>Selene setapinnis</i>          | Atlantic moonfish             |
| <i>Sardinops sagax</i>             | Pacific sardine                | <i>Semele solida</i>              | Chilean semele                |
| <i>Sarpa salpa</i>                 | Salema                         | <i>Semicossyphus pulcher</i>      | California sheephead          |
| <i>Saurida undosquamis</i>         | Brushtooth lizardfish          | Sergestidae                       | Sergestid shrimp              |
| <i>Saxidomus gigantean</i>         | Butter clam                    | <i>Seriola dumerili</i>           | Greater amberjack             |
| <i>Scapharca cornea</i>            | Half-crenated ark              | <i>Seriola porosa</i>             | Choicy ruff                   |
| <i>Scarus</i>                      | Scarus                         | <i>Seriolina nigrofasciata</i>    | Blackbanded trevally          |
| <i>Scarus persicus</i>             | Gulf parrotfish                | <i>Serranus cabrilla</i>          | Comber                        |
| <i>Scarus rubroviolaceus</i>       | Ember parrotfish               | <i>Shrimps andprawns</i>          | Shrimps and prawns            |
| <i>Scatophagus</i>                 | Scats                          | <i>Sicyonia brevirostris</i>      | Rock shrimp                   |
| <i>Schedophilus ovalis</i>         | Imperial blackfish             | <i>Sicyonia ingentis</i>          | Ridgeback rock shrimp         |
| <i>Schedophilus pemarko</i>        | Pemarko blackfish              | Siganidae                         | Rabbitfishes                  |
| <i>Sciaena umbra</i>               | Brown meagre                   | <i>Siliqua patula</i>             | Pacific razor clam            |
| <i>Sciaenops ocellatus</i>         | Red drum                       | <i>Sillago sihama</i>             | Silver sillago                |
| <i>Scolopsis taeniata</i>          | Black-streaked monocle bream   | <i>Solea senegalensis</i>         | Senegalese sole               |
| <i>Scomber</i>                     | Mackerels                      | <i>Solen</i>                      | Razor clams                   |
| Scomberesocidae                    | Sauries                        | <i>Solen vagina</i>               | European razor clam           |
| <i>Scomberesox saurus saurus</i>   | Atlantic saury                 | Solenidae                         | Razor clams and knife clams   |
| <i>Scomberoides</i>                | Queenfishes                    | <i>Solenocera agassizii</i>       | Kolibri shrimp                |
| <i>Scomberoides commersonianus</i> | Talang queenfish               | <i>Somniosus microcephalus</i>    | Greenland shark               |
| <i>Scomberoides tol</i>            | Needlescaled queenfish         | <i>Somniosus rostratus</i>        | Little sleeper shark          |
| <i>Scomberomorus</i>               | Seerfishes                     | <i>Sparus aurata</i>              | Gilthead seabream             |
| <i>Scomberomorus commerson</i>     | Narrow-barred Spanish mackerel | <i>Sphaeroides maculatus</i>      | Northern puffer               |

41  
42

## 43 (ii) Continue

| Taxon Name                          | Common Name                  | Taxon Name                             | Common Name             |
|-------------------------------------|------------------------------|----------------------------------------|-------------------------|
| <i>Spicara</i>                      | Picarels                     | <i>Trigloporus lastoviza</i>           | Streaked gurnard        |
| <i>Spicara maena</i>                | Blotched picarel             | <i>Trigloporus quadricornis</i>        | Fourhorn sculpin        |
| <i>Spicara smaris</i>               | Picarel                      | <i>Trisopterus minutus</i>             | Poor cod                |
| <i>Spisula</i>                      | Surf clam                    | <i>Turbo</i>                           | Turbo snails            |
| <i>Spisula solida</i>               | Surf clam                    | <i>Turbo cornutus</i>                  | Horned turban           |
| <i>Spratelloides gracilis</i>       | Silverstriped round herring  | <i>Tylosurus crocodilus crocodilus</i> | Hound needlefish        |
| <i>Sprattus sprattus</i>            | European sprat               | <i>Umbrina canariensis</i>             | Canary drum             |
| <i>Squatina squatina</i>            | Angelshark                   | <i>Umbrina canosai</i>                 | Argentine croaker       |
| Squatinae                           | Angel sharks                 | <i>Umbrina cirrosa</i>                 | Shi drum                |
| <i>Squilla mantis</i>               | Spottail mantis squillid     | <i>Upogebia pugettensis</i>            | Blue mud shrimp         |
| <i>Stenodus leucichthys</i>         | Sheefish                     | <i>Urophycis chuss</i>                 | Red hake                |
| <i>Stenotomus chrysops</i>          | Scup                         | <i>Valamugil engeli</i>                | Kanda                   |
| <i>Stephanolepis cirrhifer</i>      | Thread-sail filefish         | <i>Valamugil seheli</i>                | Bluespot mullet         |
| <i>Stereolepis gigas</i>            | Giant sea-bass               | <i>Variola albimarginata</i>           | White-edged lyretail    |
| <i>Stolephorus</i>                  | Indo-Pacific anchovies       | <i>Venus gallina</i>                   | Striped venus           |
| <i>Strangomera bentincki</i>        | Araucanian herring           | <i>Venus verrucosa</i>                 | Warty venus             |
| Stromateidae                        | Butterfishes                 | <i>Xiphopenaeus kroyeri</i>            | Atlantic seabob         |
| <i>Symphodus melops</i>             | Corkwing wrasse              | <i>Zenarchopterus dispar</i>           | Feathered river-garfish |
| Synodontidae                        | Lizardfishes                 | <i>Zenopsis conchifer</i>              | Silvery John dory       |
| <i>Takifugu vermicularis</i>        | Pear puffer                  | <i>Zidona dufresnei</i>                | Angulate volute         |
| <i>Tapes</i>                        | Tapes clams                  | <i>Zoarcetes viviparus</i>             | Viviparous blenny       |
| <i>Tapes pullastra</i>              | Pullet carpet shell          |                                        |                         |
| <i>Tapes rhomboids</i>              | Banded carpet shell          |                                        |                         |
| <i>Tautoglabrus adspersus</i>       | Cunner                       |                                        |                         |
| <i>Tawera gayi</i>                  | Gay's little venus           |                                        |                         |
| <i>Tegillarca granosa</i>           | Granular ark                 |                                        |                         |
| <i>Tenualosa ilisha</i>             | Hilsa shad                   |                                        |                         |
| <i>Tenualosa toil</i>               | Toli shad                    |                                        |                         |
| <i>Terapon</i>                      | Trumpeters                   |                                        |                         |
| <i>Thalassoma pavo</i>              | Ornate wrasse                |                                        |                         |
| <i>Thenus orientalis</i>            | Flathead lobster             |                                        |                         |
| <i>Thryssa</i>                      | Thryssa                      |                                        |                         |
| <i>Tivela mactroides</i>            | Trigonal tivela              |                                        |                         |
| <i>Tonna galea</i>                  | Helmet ton                   |                                        |                         |
| <i>Trachinotus carolinus</i>        | Florida pompano              |                                        |                         |
| <i>Trachinotus mookalee</i>         | Indian pompano               |                                        |                         |
| <i>Trachinotus ovatus</i>           | Derbio                       |                                        |                         |
| <i>Trachinus draco</i>              | Greater weever               |                                        |                         |
| <i>Trachurus japonicas</i>          | Japanese jack mackerel       |                                        |                         |
| <i>Trachurus mediterraneus</i>      | Mediterranean horse mackerel |                                        |                         |
| <i>Trachurus trecae</i>             | Cunene horse mackerel        |                                        |                         |
| <i>Trachysalambria curvirostris</i> | Southern rough shrimp        |                                        |                         |
| <i>Trematomus hansonii</i>          | Striped rockcod              |                                        |                         |
| <i>Tresus</i>                       | Gaper clams                  |                                        |                         |
| Triglidae                           | Searobins                    |                                        |                         |

44

45

**(iii) Species/taxon group being caught in both high seas and EEZs.**

| Taxon Name                       | Common Name                               | Taxon Name                       | Common Name               |
|----------------------------------|-------------------------------------------|----------------------------------|---------------------------|
| <i>Acanthistius brasilianus</i>  | Sea bass                                  | <i>Bathyraja</i>                 | Skates                    |
| <i>Acanthocybium solandri</i>    | Wahoo                                     | <i>Bathyraja meridionalis</i>    | Dark-belly skate          |
| Acanthuridae                     | Surgeonfishes and tangs and unicornfishes | <i>Bathyraja murrayi</i>         | Murrays skate             |
| <i>Aethaloperca rogae</i>        | Redmouth grouper                          | <i>Belone</i>                    | Needlefishes              |
| <i>Alepes djedaba</i>            | Shrimp scad                               | <i>Benthodesmus</i>              | Frostfishes               |
| <i>Alepocephalus bairdii</i>     | Baird's slickhead                         | Berycidae*                       | Alfonsinos                |
| <i>Alepocephalus rostratus</i>   | Rissos smooth-head                        | <i>Beryx</i>                     | Alfonsinos                |
| <i>Allocyttus niger</i>          | Black oreo                                | <i>Beryx splendens</i>           | Splendid alfonsino        |
| <i>Alopias</i>                   | Thresher sharks                           | Bivalvia                         | Clams                     |
| <i>Alopias superciliosus</i>     | Bigeye thresher                           | <i>Bolbometopon muricatum</i>    | Green humphead parrotfish |
| <i>Alopias vulpinus</i>          | Thintail thresher                         | <i>Boreogadus saida</i>          | Polar cod                 |
| <i>Alosa</i>                     | Shads                                     | <i>Borostomias antarcticus</i>   | Snaggletooth              |
| <i>Alosa aestivalis</i>          | Blueback shad                             | Bothidae                         | Lefteye flounders         |
| <i>Alosa fallax</i>              | Twaite shad                               | <i>Bothus pantherinus</i>        | Leopard flounder          |
| <i>Alosa mediocris</i>           | Hickory shad                              | Brachyura                        | Marine crabs              |
| <i>Alosa pseudoharengus</i>      | Alewife                                   | <i>Brama brama</i>               | Atlantic pomfret          |
| <i>Ammodytes</i>                 | Sandlances                                | Bramidae                         | Pomfrets                  |
| <i>Anarhichas</i>                | Wolffish                                  | <i>Brevoortia pectinata</i>      | Argentine menhaden        |
| <i>Anarhichas denticulatus</i>   | Northern wolffish                         | <i>Brevoortia tyrannus</i>       | Atlantic menhaden         |
| <i>Anarhichas lupus</i>          | Atlantic wolffish                         | <i>Brosme brosme</i>             | Tusk                      |
| <i>Anarhichas minor</i>          | Spotted wolffish                          | <i>Brotula barbata</i>           | Bearded brotula           |
| Anguilliformes                   | Eels and morays                           | <i>Busycon</i>                   | Whelks                    |
| <i>Anoplopoma fimbria</i>        | Sablefish                                 | Caesionidae                      | Fusiliers                 |
| <i>Antimora rostrata</i>         | Blue antimora                             | Caproidae                        | Boarfishes                |
| <i>Aphanopus carbo</i>           | Black scabbardfish                        | Carangidae                       | Jacks and pompanos        |
| <i>Aphanopus intermedius</i>     | Intermediate scabbardfish                 | <i>Carangoides bajad</i>         | Orangespotted trevally    |
| <i>Aphareus rutilans</i>         | Rusty jobfish                             | <i>Carangoides fulvoguttatus</i> | Yellowspotted trevally    |
| Apogonidae                       | Cardinalfishes                            | <i>Carangoides malabaricus</i>   | Malabar trevally          |
| <i>Arctica islandica</i>         | Ocean quahog                              | <i>Caranx</i>                    | Jacks                     |
| <i>Arctoscopus japonicus</i>     | Sailfin sandfish                          | <i>Caranx hippos</i>             | Crevalle jack             |
| <i>Argentina</i>                 | Argentines                                | <i>Caranx ignobilis</i>          | Giant trevally            |
| <i>Argentina silus</i>           | Greater argentine                         | Carcharhinidae                   | Requiem sharks            |
| <i>Argopecten irradians</i>      | Atlantic bay scallop                      | Carcharhiniformes                | Ground sharks             |
| <i>Argyrops spinifer</i>         | King soldierbream                         | <i>Carcharhinus falciformis</i>  | Silky shark               |
| <i>Argyrosomus hololepidotus</i> | Southern meagre                           | <i>Carcharhinus limbatus</i>     | Blacktip shark            |
| <i>Ariomma indicum</i>           | Indian driftfish                          | <i>Carcharhinus longimanus</i>   | Oceanic whitetip shark    |
| Asteroidea                       | Sea stars                                 | <i>Carcharhinus plumbeus</i>     | Sandbar shark             |
| <i>Atheresthes evermanni</i>     | Kamchatka flounder                        | <i>Carcharias taurus</i>         | Sand tiger shark          |
| Atherinidae                      | Silversides                               | <i>Carcharodon carcharias</i>    | Great white shark         |
| <i>Aulacomya ater</i>            | Chilean ribbed mussel                     | Cardiidae                        | Cockles                   |
| <i>Austroglossus</i>             | Southern soles                            | <i>Centriscoops humerosus</i>    | Banded yellowfish         |
| <i>Auxis</i>                     | Frigate tuna                              | <i>Centroberyx affinis</i>       | Redfish                   |
| <i>Auxis rochei rochei</i>       | Bullet tuna                               | Centrolophidae                   | Medusafishes              |
| <i>Auxis thazard thazard</i>     | Frigate tuna                              | <i>Centrophorus lusitanicus</i>  | Lowfin gulper shark       |
| Bathylagidae                     | Deep-sea smelts                           | <i>Centrophorus squamosus</i>    | Leafscale gulper shark    |
| <i>Bathylagus</i>                | Bathylagus                                | <i>Centrosyllium fabricii</i>    | Black dogfish             |

## (iii) Continue

| Taxon Name                       | Common Name                                   | Taxon Name                          | Common Name                    |
|----------------------------------|-----------------------------------------------|-------------------------------------|--------------------------------|
| <i>Centroscymnus coelolepis</i>  | Portuguese dogfish                            | <i>Dentex</i>                       | Seabreams ( <i>Dentex</i> spp) |
| <i>Centroscymnus crepidater</i>  | Longnose velvet dogfish                       | <i>Dentex macrophthalmus</i>        | Large-eye dentex               |
| <i>Cephalopholis argus</i>       | Peacock hind                                  | <i>Diastobranchus capensis</i>      | Basketwork eel                 |
| <i>Cephalopholis boenak</i>      | Chocolate hind                                | <i>Dicentrarchus</i>                | European/spotted seabass       |
| <i>Cephalopholis miniata</i>     | Coral hind                                    | <i>Diplodus cervinus cervinus</i>   | Zebra seabream                 |
| Cephalopoda                      | Cephalopods                                   | <i>Dipturus batis</i>               | Blue skate                     |
| <i>Cetorhinus maximus</i>        | Basking shark                                 | <i>Dipturus oxyrinchus</i>          | Longnosed skate                |
| <i>Chaceon affinis</i>           | Deep-sea red crab                             | <i>Dissostichus eleginoides</i>     | Patagonian toothfish           |
| <i>Chaceon quinquegens</i>       | Red deepsea crab                              | <i>Dorosoma cepedianum</i>          | American gizzard shad          |
| <i>Chaenocephalus aceratus</i>   | Blackfin icefish                              | <i>Doryteuthis pealeii</i>          | Longfin inshore squid          |
| <i>Champscephalus gunnari</i>    | Mackerel icefish                              | <i>Dosidicus gigas</i>              | Jumbo flying squid             |
| Channichthyidae*                 | Crocodile icefishes                           | <i>Dussumieria elopsoides</i> *     | Slender rainbow sardine        |
| <i>Cheilinus undulates</i>       | Humphead wrasse                               | Echeneidae                          | Remoras                        |
| <i>Cheilodactylus variegatus</i> | Peruvian morwong                              | Echinoidea                          | Sea urchins                    |
| <i>Cheilopogon agoo</i>          | Japanese flyingfish                           | <i>Elagatis bipinnulata</i>         | Rainbow runner                 |
| <i>Chelidonichthys cuculus</i>   | Red gurnard                                   | Elasmobranchii                      | Sharks and rays                |
| <i>Chimaera monstrosa</i>        | Rabbit fish                                   | <i>Emmelichthys nitidus nitidus</i> | Cape bonnetmouth               |
| Chimaeriformes                   | Chimaeras                                     | Engraulidae                         | Anchovies                      |
| <i>Chionoecetes</i>              | Pacific snow crabs                            | <i>Engraulis anchoita</i>           | Argentine anchovy              |
| <i>Chionoecetes opilio</i>       | Queen crab                                    | <i>Epigonus</i>                     | Cardinalfishes                 |
| <i>Chlamys islandica</i>         | Iceland scallop                               | <i>Epigonus telescopus</i>          | Black cardinal fish            |
| <i>Chrysoblephus</i>             | Seabreams                                     | <i>Epinephelus chlorostigma</i>     | Brownspeckled grouper          |
| <i>Citharichthys sordidus</i>    | Pacific sanddab                               | <i>Epinephelus fasciatus</i>        | Blacktip grouper               |
| Clams or cockles and arkshells   | Clams cockles and arkshells                   | <i>Epinephelus fuscoguttatus</i>    | Brown-marbled grouper          |
| <i>Clupea harengus</i>           | Atlantic herring                              | <i>Epinephelus marginatus</i>       | Dusky grouper                  |
| <i>Clupea pallasii pallasii</i>  | Pacific herring                               | <i>Epinephelus merra</i>            | Honeycomb grouper              |
| Clupeidae                        | Herrings and shads and sardines and menhadens | <i>Epinephelus morrhua</i>          | Comet grouper                  |
| Clupeiformes                     | Herrings                                      | <i>Epinephelus polyphkadion</i>     | Camouflage grouper             |
| Clupeoids                        | Herrings sardines and anchovies               | <i>Epinephelus tauvina</i>          | Greasy grouper                 |
| <i>Cololabis saira</i>           | Pacific saury                                 | <i>Etmopterus</i>                   | Lanternsharks                  |
| <i>Concholepas concholepas</i>   | False abalone                                 | <i>Etmopterus granulosus</i>        | Southern lanternshark          |
| <i>Conger conger</i>             | European conger                               | <i>Euphausia superba</i> *          | Antarctic krill                |
| Congridae                        | Conger and garden eels                        | <i>Euthynnus affinis</i>            | Kawakawa                       |
| <i>Coregonus laurettae</i>       | Bering cisco                                  | <i>Euthynnus alletteratus</i>       | Little tunny                   |
| <i>Coregonus sardinella</i>      | Sardine cisco                                 | <i>Euthynnus lineatus</i>           | Black skipjack                 |
| <i>Coryphaena hippurus</i>       | Common dolphinfish                            | <i>Eutrigla gurnardus</i>           | Grey gurnard                   |
| <i>Coryphaenoides rupestris</i>  | Roundnose grenadier                           | Exocoetidae                         | Flyingfishes                   |
| Cottidae                         | Sculpins                                      | Gadiformes                          | Cods                           |
| Crustacea                        | Crustaceans                                   | <i>Gadus macrocephalus</i>          | Pacific cod                    |
| Cynoglossidae                    | Tonguefishes                                  | <i>Gadus morhua</i>                 | Atlantic cod                   |
| <i>Cynoscion regalis</i>         | Gray weakfish                                 | <i>Gaidropsarus</i>                 | Rocklings                      |
| <i>Dalatias licha</i>            | Kitefin shark                                 | Galatheididae                       | Squat lobsters                 |
| Dasyatidae                       | Stingrays                                     | <i>Galeocerdo cuvier</i>            | Tiger shark                    |
| <i>Deania calcea</i>             | Birdbeak dogfish                              | <i>Galeorhinus galeus</i>           | Tope shark                     |
| <i>Decapterus</i>                | Scads                                         | <i>Galeus</i>                       | Catsharks                      |
| <i>Decapterus russelli</i>       | Indian scad                                   | Gempylidae                          | Snake mackerels                |

## (iii) Continue

| Taxon Name                                      | Common Name                      | Taxon Name                           | Common Name               |
|-------------------------------------------------|----------------------------------|--------------------------------------|---------------------------|
| <i>Genypterus</i>                               | Cusk eels                        | <i>Lepidocybium flavobrunneum</i>    | Escolar                   |
| <i>Genypterus blacodes</i>                      | Pink cusk-eel                    | <i>Lepidonotothen larseni</i>        | Lepidonotothen larseni    |
| <i>Genypterus chilensis</i>                     | Red cusk-eel                     | <i>Lepidonotothen nudifrons</i>      | Yellowfin notie           |
| Gerreidae                                       | Mojarras                         | <i>Lepidonotothen squamifrons</i>    | Grey rockcod              |
| <i>Gerres</i>                                   | Silver biddies                   | <i>Lepidopsetta bilineata</i>        | Rock sole                 |
| <i>Geryon</i>                                   | Deepsea crabs                    | <i>Lepidopus caudatus</i>            | Silver scabbardfish       |
| <i>Glyptocephalus cynoglossus</i>               | Witch flounder                   | <i>Lepidorhombus</i>                 | Megrim                    |
| <i>Gobionotothen gibberifrons</i>               | Humped rockcod                   | <i>Lepidorhombus boscii</i>          | Four-spot megrim          |
| <i>Gymnocranius</i>                             | Large-eye breams                 | <i>Lepidorhynchus denticulatus</i>   | Thorntooth grenadier      |
| <i>Gymnosarda unicolor</i>                      | Dogtooth tuna                    | <i>Lethrinus mahsena</i>             | Sky emperor               |
| <i>Gymnothorax</i>                              | Gymnothorax                      | <i>Lethrinus microdon</i>            | Smalltooth emperor        |
| Haemulidae                                      | Grunts                           | <i>Lethrinus obsoletus</i>           | Orange-striped emperor    |
| <i>Halargyreus johnsonii</i>                    | Slender codling                  | <i>Leucoraja circularis</i>          | Sandy ray                 |
| <i>Haliporoides diomedea</i>                    | Chilean nylon shrimp             | <i>Leucoraja erinacea</i>            | Little skate              |
| <i>Harengula</i>                                | Herring                          | <i>Limanda ferruginea</i>            | Yellowtail flounder       |
| <i>Helicolenus dactylopterus</i>                | Blackbelly rosefish              | <i>Limanda limanda</i>               | Common dab                |
| <i>Hexanchus griseus</i>                        | Bluntnose sixgill shark          | <i>Lithodes</i>                      | Lithodes                  |
| <i>Hippoglossoides platessoides</i>             | American plaice                  | <i>Lithodes antarcticus</i>          | Southern king crab        |
| <i>Hippoglossus hippoglossus</i>                | Atlantic halibut                 | Lithodidae                           | King crabs                |
| Holothuroidea                                   | Sea cucumbers                    | <i>Littorina</i>                     | Periwinkles               |
| Homaridae and Palinuridae                       | Lobsters and spiny-rock lobsters | <i>Lobotes surinamensis</i>          | Atlantic tripletail       |
| <i>Hoplostethus atlanticus</i>                  | Orange roughy                    | <i>Loligo</i>                        | Common squids             |
| <i>Hoplostethus mediterraneus mediterraneus</i> | Mediterranean slimehead          | <i>Loligo forbesii</i>               | Veined Squid              |
| <i>Hydrolagus</i>                               | Chimaeras                        | <i>Loligo gahi</i>                   | Patagonian squid          |
| <i>Hydrolagus novaezealandiae</i>               | Dark ghost shark                 | <i>Loligo opalescens</i>             | California market squid   |
| <i>Hyperoglyphe antarctica</i>                  | Bluenose warehou                 | Lophiidae                            | Goosefishes               |
| <i>Hyperoglyphe bythites</i>                    | Black driftfish                  | <i>Lophius</i>                       | Monkfishes                |
| <i>Illex argentines</i>                         | Argentine shortfin squid         | <i>Lophius americanus</i>            | American angler           |
| <i>Illex coindetii</i>                          | Broadtail shortfin squid         | <i>Lophius budegassa</i>             | Black-bellied angler      |
| <i>Illex illecebrosus</i>                       | Northern shortfin squid          | <i>Lophius gastrophysus</i>          | Blackfin goosefish        |
| <i>Isacia conceptionis</i>                      | Cabinza grunt                    | <i>Lophius vomerinus</i>             | Cape monk                 |
| Istiophoridae                                   | Billfishes                       | <i>Lopholatilus chamaeleonticeps</i> | Great northern tilefish   |
| <i>Istiophorus albicans</i>                     | Atlantic sailfish                | Lutjanidae                           | Snappers                  |
| <i>Istiophorus platypterus</i>                  | Indo-Pacific sailfish            | <i>Lutjanus</i>                      | Snappers                  |
| <i>Isurus</i>                                   | Mako sharks                      | <i>Lutjanus argentimaculatus</i>     | Mangrove red snapper      |
| <i>Isurus oxyrinchus</i>                        | Shortfin mako                    | <i>Lutjanus bohar</i>                | Two-spot red snapper      |
| <i>Joturus pichardi</i>                         | Bobo mullet                      | <i>Lutjanus gibbus</i>               | Humpback red snapper      |
| <i>Kathetostoma giganteum</i>                   | Giant stargazer                  | <i>Lutjanus kasmira</i>              | Common bluestripe snapper |
| <i>Katsuwonus pelamis</i>                       | Skipjack tuna                    | <i>Lutjanus quinquelineatus</i>      | Five-lined snapper        |
| King crabs and squat-lobsters                   | Craylets and squat lobsters      | <i>Lutjanus synagris</i>             | Lane snapper              |
| <i>Kyphosus</i>                                 | Sea chubs                        | <i>Lycodes</i>                       | Eelpouts                  |
| Labridae                                        | Wrasses                          | <i>Macroramphosus scolopax</i>       | Longspine snipefish       |
| <i>Lamna nasus</i>                              | Porbeagle                        | Macrouridae                          | Grenadiers or rattails    |
| Lamnidae                                        | Mackerel sharks and white sharks | <i>Macrourus</i>                     | Grenadiers                |
| <i>Lampanyctodes hectoris</i>                   | Hectors lanternfish              | <i>Macrourus berglax</i>             | Onion-eye grenadier       |
| <i>Lampris guttatus</i>                         | Opah                             | <i>Macrourus holotrachys*</i>        | Bigeeye grenadier         |

## 55 (iii) Continue

| Taxon Name                       | Common Name                | Taxon Name                          | Common Name                          |
|----------------------------------|----------------------------|-------------------------------------|--------------------------------------|
| <i>Macruronus magellanicus</i>   | Patagonian grenadier       | Mugilidae                           | Mulletts                             |
| <i>Macruronus novaezelandiae</i> | Blue grenadier             | <i>Mulinia</i>                      | Taquilla clams                       |
| Mactridae                        | Mactra surf clams          | Mullidae                            | Goatfishes                           |
| <i>Mactromeris polynyma</i>      | Arctic surfclam            | <i>Mulloidichthys flavolineatus</i> | Yellowstripe goatfish                |
| <i>Makaira indica</i>            | Black marlin               | <i>Mullus</i>                       | Western goatfishes                   |
| <i>Makaira mazara</i>            | Indo-Pacific blue marlin   | <i>Muraenesox</i>                   | Conger eels                          |
| <i>Makaira nigricans</i>         | Atlantic blue marlin       | <i>Muraenolepis*</i>                | Moray cods                           |
| Malacanthidae                    | Tilefishes                 | <i>Muraenolepis microps*</i>        | Smalleye moray cod                   |
| <i>Mallotus villosus</i>         | Capelin                    | <i>Mustelus</i>                     | Smooth-hounds                        |
| <i>Mancopsetta maculata</i>      | Antarctic armless flounder | <i>Mycteroperca</i>                 | Cat groupers                         |
| <i>Antarctica</i>                |                            | Myctophidae                         | Lanternfishes                        |
| Marine animals                   | Marine animals             | Myliobatidae                        | Eagle and manta rays                 |
| Marine fishes not identified     | Marine fishes              | <i>Myoxocephalus</i>                | Sculpins                             |
| Marine fishes not identified     | Finfishes                  | Mytilidae                           | Sea mussels                          |
| Marine fishes not identified     | Groundfishes               | <i>Mytilus</i>                      | Mussels                              |
| <i>Martialia hyadesi</i>         | Sevenstar flying squid     | <i>Mytilus edulis</i>               | Blue mussel                          |
| <i>Megalops cyprinoides</i>      | Indo-Pacific tarpon        | Myxinidae                           | Hagfishes                            |
| <i>Melanogrammus aeglefinus</i>  | Haddock                    | <i>Naso unicornis</i>               | Bluespine unicornfish                |
| <i>Menidia menidia</i>           | Atlantic silverside        | <i>Nemadactylus</i>                 | Porae                                |
| <i>Menticirrhus</i>              | Kingcroakers               | <i>Nemadactylus bergi</i>           | White morwong                        |
| <i>Mercenaria mercenaria</i>     | Northern quahog            | Nemipteridae                        | Threadfin breams and Whiptail breams |
| <i>Merlangius merlangus</i>      | Whiting                    | <i>Nemipterus randalli</i>          | Randalls threadfin bream             |
| <i>Merluccius</i>                | Hakes                      | <i>Nephrops norvegicus</i>          | Norway lobster                       |
| <i>Merluccius australis</i>      | Southern hake              | <i>Netuma thalassina</i>            | Giant catfish                        |
| <i>Merluccius bilinearis</i>     | Silver hake                | <i>Nezumia aequalis</i>             | Common Atlantic grenadier            |
| <i>Merluccius gayi gayi</i>      | South Pacific hake         | <i>Notothenia coriiceps*</i>        | Black rockcod                        |
| <i>Merluccius hubbsi</i>         | Argentine hake             | <i>Notothenia rossii</i>            | Marbled rockcod                      |
| <i>Merluccius merluccius</i>     | European hake              | Nototheniidae                       | Cod icefishes                        |
| <i>Merluccius productus</i>      | North Pacific hake         | <i>Nototodarus sloanii</i>          | Wellington flying squid              |
| <i>Metanephrops</i>              | Lobsterette                | Octopoda                            | Octopuses                            |
| <i>Metanephrops challengerii</i> | New Zealand lobster        | <i>Odontesthes regia</i>            | Silverside                           |
| <i>Metanephrops mozambicus</i>   | Mozambique lobster         | Ommastrephidae                      | Arrow squids                         |
| <i>Microchirus</i>               | Iberian soles              | <i>Oncorhynchus</i>                 | Pacific salmon                       |
| <i>Microchirus variegatus</i>    | Thickback sole             | <i>Oncorhynchus gorbuscha</i>       | Pink salmon                          |
| <i>Micromesistius australis</i>  | Southern blue whiting      | <i>Oncorhynchus keta</i>            | Chum salmon                          |
| <i>Micromesistius poutassou</i>  | Blue whiting               | <i>Oncorhynchus masou masou</i>     | Masu salmon                          |
| <i>Microstomus kitt</i>          | Lemon sole                 | <i>Oncorhynchus nerka</i>           | Sockeye salmon                       |
| Miscellaneous marine crustaceans | Marine crustaceans         | <i>Oncorhynchus tshawytscha</i>     | Chinook salmon                       |
| Miscellaneous marine molluscs    | Marine molluscs            | Ophichthidae                        | Snake eels                           |
| <i>Mola mola</i>                 | Ocean sunfish              | <i>Opisthonema oglinum</i>          | Atlantic thread herring              |
| <i>Molva</i>                     | Lings                      | <i>Orcynopsis unicolor</i>          | Plain bonito                         |
| <i>Molva dypterygia</i>          | Blue ling                  | Oreosomatidae                       | Oreos                                |
| <i>Molva molva</i>               | Ling                       | Osmeridae                           | Smelts                               |
| <i>Monotaxis grandoculis</i>     | Humpnose big-eye bream     | <i>Osmerus mordax mordax</i>        | Rainbow smelt                        |
| <i>Mora moro</i>                 | Common mora                | <i>Oxynotus paradoxus</i>           | Sailfin roughshark                   |
| Moridae                          | Codlings                   | <i>Pagellus</i>                     | Pandoras                             |

56  
57

## 58 (iii) Continue

| Taxon Name                                   | Common Name                           | Taxon Name                           | Common Name             |
|----------------------------------------------|---------------------------------------|--------------------------------------|-------------------------|
| <i>Pagellus acarne</i>                       | Axillary seabream                     | <i>Pomatomus saltatrix</i>           | Bluefish                |
| <i>Pagellus erythrinus</i>                   | Common pandora                        | <i>Priacanthus</i>                   | Bigeyes                 |
| <i>Pagrus pagrus</i>                         | Common seabream                       | <i>Prionace glauca</i>               | Blue shark              |
| <i>Pandalopsis japonica</i>                  | Sidestripe shrimp                     | <i>Prionotus</i>                     | Sea robins              |
| <i>Pandalus</i>                              | Pandalus shrimps                      | <i>Prolatilus jugularis</i>          | Tilefish                |
| <i>Pandalus borealis</i>                     | Northern prawn                        | <i>Promethichthys prometheus</i>     | Roudi escolar           |
| <i>Pandalus goniurus</i>                     | Humpy shrimp                          | <i>Psenopsis anomala</i>             | Pacific rudderfish      |
| <i>Pandalus jordani</i>                      | Ocean shrimp                          | <i>Psettodes erumei</i>              | Indian spiny turbot     |
| <i>Panulirus argus</i>                       | Caribbean spiny lobster               | <i>Pseudochaenichthys georgianus</i> | South Georgia icefish   |
| <i>Paphia</i>                                | Short neck clams                      | <i>Pseudocyttus maculatus</i>        | Smooth oreo             |
| <i>Paralabrax humeralis</i>                  | Peruvian rock seabass                 | <i>Pseudopentaceros richardsoni</i>  | Pelagic armorhead       |
| <i>Paralichthys</i>                          | American flounders                    | <i>Pseudophycis bachus</i>           | Red codling             |
| <i>Paralithodes</i>                          | King crabs                            | <i>Pterygotrigla</i>                 | Pterygotrigla           |
| <i>Paralithodes camtschaticus</i>            | Red king crab                         | <i>Rachycentron canadum</i>          | Cobia                   |
| <i>Paralomis*</i>                            | Paralomis                             | <i>Raja</i>                          | Skates                  |
| <i>Paralomis aculeate</i>                    | Red stone crab                        | <i>Raja clavata</i>                  | Thornback ray           |
| <i>Parapenaeus longirostris</i>              | Deepwater rose shrimp                 | Rajidae                              | Skates                  |
| <i>Paristiopterus labiosus</i>               | Giant boarfish                        | Rajiformes                           | Skates and rays         |
| <i>Patagonotothen brevicauda brevicauda*</i> | Patagonian rockcod                    | <i>Rastrelliger brachysoma</i>       | Short mackerel          |
| <i>Patagonotothen ramsayi</i>                | Ramsay's icefish                      | <i>Regalecus glesne</i>              | King of herrings        |
| Pectinidae                                   | Scallops                              | <i>Reinhardtius hippoglossoides</i>  | Greenland halibut       |
| <i>Penaeus</i>                               | Penaeus shrimps                       | <i>Rexea solandri</i>                | Silver gemfish          |
| <i>Penaeus semisulcatus</i>                  | Green tiger prawn                     | <i>Rhabdosargus globiceps</i>        | White stumpnose         |
| <i>Peprilus</i>                              | Harvestfishes                         | <i>Rhinochimaera atlantica</i>       | Spearnose chimaera      |
| <i>Peprilus paru</i>                         | American harvestfish                  | Rhombosolea                          | Flounders               |
| <i>Peprilus triacanthus</i>                  | American butterflyfish                | <i>Ruvettus pretiosus</i>            | Oilfish                 |
| Perciformes                                  | Perch-likes                           | <i>Salilota australis</i>            | Tadpole codling         |
| Peristediidae                                | Armored searobins or armored gurnards | <i>Salmo salar</i>                   | Atlantic salmon         |
| <i>Phycis</i>                                | Gunnels and forkbeards                | Salmonidae                           | Salmonids               |
| <i>Placopecten magellanicus</i>              | American sea scallop                  | <i>Salvelinus</i>                    | Char                    |
| <i>Platichthys flesus</i>                    | European flounder                     | <i>Sarda sarda</i>                   | Atlantic bonito         |
| <i>Plectorhinchus pictus</i>                 | Trout sweetlips                       | <i>Sardina pilchardus</i>            | European pilchard       |
| <i>Plectorhinchus schotaf</i>                | Minstrel sweetlip                     | <i>Sardinella</i>                    | Sardinella              |
| <i>Plectropomus areolatus</i>                | Squaretail coralgroupier              | <i>Sardinella aurita</i>             | Round sardinella        |
| <i>Plectropomus leopardus</i>                | Leopard coralgroupier                 | <i>Sargocentron spiniferum</i>       | Sabre squirrelfish      |
| <i>Plectropomus pessuliferus</i>             | Roving coralgroupier                  | <i>Saurida tumbil</i>                | Greater lizardfish      |
| <i>Plesiopenaeus edwardsianus</i>            | Scarlet shrimp                        | Scaridae                             | Parrotfishes            |
| <i>Pleurogrammus monoptyerygius</i>          | Atka mackerel                         | <i>Scarus ghobban</i>                | Blue-barred parrotfish  |
| <i>Pleuronectes platessa</i>                 | European plaice                       | Sciaenidae                           | Drums or croakers       |
| Pleuronectidae                               | Righteye flounders                    | <i>Sclerocrangon</i>                 | Sculptured shrimps      |
| Pleuronectiformes                            | Flatfishes                            | <i>Scolopsis</i>                     | Monocle breams          |
| <i>Plotosus</i>                              | Eel catfishes                         | <i>Scomber australasicus</i>         | Blue mackerel           |
| <i>Pollachius pollachius</i>                 | Pollack                               | <i>Scomber japonicus</i>             | Chub mackerel           |
| <i>Pollachius virens</i>                     | Saithe                                | <i>Scomber scombrus</i>              | Atlantic mackerel       |
| <i>Polyprion americanus</i>                  | Wreckfish                             | <i>Scomberoides lysan</i>            | Doublespotted queenfish |
| <i>Pomacanthus maculosus</i>                 | Yellowbar angelfish                   | <i>Scomberomorus brasiliensis</i>    | Serra Spanish mackerel  |

59  
60

## 61 (iii) Continue

| Taxon Name                        | Common Name                               | Taxon Name                               | Common Name                                   |
|-----------------------------------|-------------------------------------------|------------------------------------------|-----------------------------------------------|
| <i>Scomberomorus cavalla</i>      | King mackerel                             | <i>Spectrunculus grandis</i>             | Pudgy cuskeel                                 |
| <i>Scomberomorus maculatus</i>    | Spanish mackerel                          | <i>Sphoeroides</i>                       | Puffers                                       |
| Scombridae                        | Mackerels tunas and bonitos               | <i>Sphyraena</i>                         | Barracudas                                    |
| Scombroids                        | Tunas bonitos and billfishes              | <i>Sphyraena barracuda</i>               | Great barracuda                               |
| Scophthalmidae                    | Turbots                                   | <i>Sphyraena jello</i>                   | Pickhandle barracuda                          |
| <i>Scorpaena</i>                  | Scorpionfish                              | <i>Sphyraena obtusata</i>                | Obtuse barracuda                              |
| <i>Scorpaena scrofa</i>           | Red scorpionfish                          | <i>Sphyrna</i>                           | Hammerhead sharks                             |
| Scorpaenidae                      | Scorpionfishes or rockfishes              | <i>Sphyrna lewini</i>                    | Scalloped hammerhead                          |
| Scorpaeniformes                   | Scorpionfishes and flatheads              | <i>Sphyrna zygaena</i>                   | Smooth hammerhead                             |
| Scyliorhinidae                    | Cat sharks                                | Sphyrnidae                               | Hammerhead and bonnethead and scoophead shark |
| <i>Scyliorhinus</i>               | Lesser catsharks                          | <i>Spisula solidissima</i>               | Atlantic surf clam                            |
| Scyllaridae                       | Slipper lobsters                          | <i>Spondyllosoma cantharus</i>           | Black seabream                                |
| <i>Scymnodon ringens</i>          | Knifetooth dogfish                        | <i>Sprattus fuegensis</i>                | Falkland sprat                                |
| Sea-urchins and other echinoderms | Sea urchins                               | Squalidae                                | Dogfish sharks                                |
| <i>Sebastes</i>                   | Redfishes                                 | Squaliformes                             | Bramble and sleeper and dogfish sharks        |
| <i>Sebastes crameri</i>           | Darkblotched rockfish                     | <i>Squalus</i>                           | Dogfishes                                     |
| <i>Sebastes entomelas</i>         | Widow rockfish                            | <i>Squalus acanthias</i>                 | Piked dogfish                                 |
| <i>Sebastes flavidus</i>          | Yellowtail rockfish                       | <i>Squatina argentina</i>                | Argentine angelshark                          |
| <i>Sebastes marinus</i>           | Ocean perch                               | Squillidae                               | Mantis shrimps                                |
| <i>Sebastes mentella</i>          | Beaked redfish                            | Starfish and other echinoderms           | Starfishes                                    |
| <i>Sebastolobus alascanus</i>     | Shortspine thornyhead                     | Stomatopoda                              | Mantis shrimps                                |
| <i>Selar crumenophthalmus</i>     | Bigeye scad                               | <i>Stromateus fiatola</i>                | Blue butterfish                               |
| <i>Sepia officinalis</i>          | Common cuttlefish                         | <i>Strombus</i>                          | Stromboid conchs                              |
| <i>Sepiida</i>                    | Cuttlefishes                              | <i>Strongylocentrotus</i>                | Sea urchins                                   |
| Sepiidae                          | Cuttlefishes                              | <i>Strongylocentrotus droebachiensis</i> | Green sea urchin                              |
| <i>Seriola</i>                    | Amberjacks                                | <i>Tautoga onitis</i>                    | Tautog                                        |
| <i>Seriola lalandi</i>            | Yellowtail amberjack                      | Tetraodontidae                           | Puffers                                       |
| <i>Seriola</i>                    | Barrelfishes                              | <i>Tetrapturus albidus</i>               | Atlantic white marlin                         |
| <i>Seriola brama</i>              | Common warehou                            | <i>Tetrapturus angustirostris</i>        | Shortbill spearfish                           |
| <i>Seriola caerulea</i>           | White warehou                             | <i>Tetrapturus audax</i>                 | Striped marlin                                |
| <i>Seriola punctate</i>           | Silver warehou                            | <i>Tetrapturus pfluegeri</i>             | Longbill spearfish                            |
| Serranidae                        | Sea basses or groupers and fairy basslets | Teuthida                                 | Squids                                        |
| <i>Serranus</i>                   | Groupers                                  | <i>Thaleichthys pacificus</i>            | Eulachon                                      |
| Sharks or rays and chimaeras      | Sharks rays and skates etc                | <i>Theragra chalcogramma</i>             | Alaska pollock                                |
| Sharks rays and chimaeras         | Various sharks                            | <i>Thunnus</i>                           | Tuna                                          |
| Sharks rays and chimaeras         | Cartilaginous fishes                      | <i>Thunnus alalunga</i>                  | Albacore                                      |
| Shrimps and prawns                | Natantian decapods                        | <i>Thunnus albacares</i>                 | Yellowfin tuna                                |
| <i>Siganus</i>                    | Rabbitfishes                              | <i>Thunnus atlanticus</i>                | Blackfin tuna                                 |
| Sillaginidae                      | Smelt-whitings                            | <i>Thunnus maccoyii</i>                  | Southern bluefin tuna                         |
| <i>Solea</i>                      | Soles                                     | <i>Thunnus obesus</i>                    | Bigeye tuna                                   |
| <i>Solea solea</i>                | Common sole                               | <i>Thunnus orientalis</i>                | Pacific bluefin tuna                          |
| Soleidae                          | Soles                                     | <i>Thunnus thynnus</i>                   | Atlantic bluefin tuna                         |
| Sparidae                          | Porgies                                   | <i>Thunnus tonggol</i>                   | Longtail tuna                                 |

62  
63



## 64 (iii) Continue

| Taxon Name                     | Common Name              |
|--------------------------------|--------------------------|
| <i>Thysites atun</i>           | Snoek                    |
| <i>Todarodes pacificus</i>     | Japanese flying squid    |
| <i>Todarodes sagittatus</i>    | European flying squid    |
| Trachichthyidae                | Slimeheads               |
| Trachinidae                    | Weeverfishes             |
| <i>Trachinotus</i>             | Pompanos                 |
| <i>Trachinotus blochii</i>     | Snubnose pompano         |
| <i>Trachinus</i>               | Weevers                  |
| <i>Trachipterus</i>            | Deaf fishes              |
| <i>Trachurus</i>               | Jack and horse mackerels |
| <i>Trachurus capensis</i>      | Cape horse mackerel      |
| <i>Trachurus declivis</i>      | Greenback horse mackerel |
| <i>Trachurus lathami</i>       | Rough scad               |
| <i>Trachurus murphyi</i>       | Chilean jack mackerel    |
| <i>Trachurus picturatus</i>    | Blue jack mackerel       |
| <i>Trachurus symmetricus</i>   | Pacific jack mackerel    |
| <i>Trachurus trachurus</i>     | Atlantic horse mackerel  |
| <i>Trachyrincus scabrous</i>   | Roughsnout grenadier     |
| <i>Trematomus</i>              | Antarctic rockcods       |
| Triakidae                      | Houndsharks              |
| Trichiuridae                   | Cutlassfishes            |
| <i>Trichiurus lepturus</i>     | Largehead hairtail       |
| <i>Trigla</i>                  | Gurnards                 |
| <i>Trigla lyra</i>             | Piper gurnard            |
| <i>Tripterygius gilchristi</i> | Grenadier cod            |
| <i>Trisopterus esmarkii</i>    | Norway pout              |
| <i>Trisopterus luscus</i>      | Pouting                  |
| <i>Tylosurus</i>               | Needlefishes             |
| <i>Upeneus</i>                 | Tropical goatfishes      |
| <i>Urophycis brasiliensis</i>  | Brazilian codling        |
| <i>Urophycis tenuis</i>        | White hake               |
| <i>Variola louti</i>           | Yellow-edged lyretail    |
| Veneridae                      | Venus clams              |
| <i>Xiphias gladius</i>         | Swordfish                |
| Zeidae                         | Dories                   |
| <i>Zenopsis nebulosa</i>       | Mirror dory              |
| <i>Zeus faber</i>              | John dory                |
| <i>Zoarces americanus</i>      | Ocean pout               |
| <i>Zygochlamys patagonica</i>  | Patagonean scallop       |

**Table 2 | Forecasted total gains and losses in catch quantity and landed value by country, given three scenarios of increased total straddling stock catch following the closure of high seas areas to fishing (10%, 42%, and 70%). In addition, two additional scenarios are considered that result in a balance of global fisheries gains and losses from the closure, i.e., a net gain of | <.0001% | in catch and landed value, (18% and 20%, respectively). Increased straddling stock catch scenarios are based on the range of model outcomes produced by White and Costello<sup>1</sup>. Ranking is given according to the largest gains in total landed value.**

| Country       | 10%  |                             |                    | 18%  |                             |                    | 20%  |                             |                    | 42%  |                             |                    | 70%  |                             |                    |
|---------------|------|-----------------------------|--------------------|------|-----------------------------|--------------------|------|-----------------------------|--------------------|------|-----------------------------|--------------------|------|-----------------------------|--------------------|
|               | Rank | Landed value (million US\$) | Catch (thousand t) | Rank | Landed value (million US\$) | Catch (thousand t) | Rank | Landed value (million US\$) | Catch (thousand t) | Rank | Landed value (million US\$) | Catch (thousand t) | Rank | Landed value (million US\$) | Catch (thousand t) |
| Albania       | 74   | 0.30                        | 0.15               | 88   | 0.54                        | 0.26               | 90   | 0.60                        | 0.29               | 101  | 1.28                        | 0.61               | 109  | 2.13                        | 1.02               |
| Algeria       | 30   | 9.52                        | 14.29              | 37   | 16.75                       | 25.14              | 39   | 18.88                       | 28.33              | 47   | 40.00                       | 60.03              | 51   | 66.67                       | 100.04             |
| Amer Samoa    | 152  | -14.15                      | -4.71              | 159  | -14.02                      | -4.66              | 161  | -13.98                      | -4.65              | 168  | -13.57                      | -4.51              | 178  | -13.07                      | -4.34              |
| Angola        | 17   | 22.56                       | 14.00              | 21   | 40.87                       | 25.37              | 21   | 46.26                       | 28.71              | 29   | 99.79                       | 61.93              | 32   | 167.37                      | 103.86             |
| Anguilla      | 94   | 0.09                        | 0.01               | 108  | 0.15                        | 0.01               | 110  | 0.17                        | 0.02               | 121  | 0.36                        | 0.03               | 131  | 0.60                        | 0.06               |
| Antigua Barb  | 47   | 1.70                        | 0.45               | 57   | 2.98                        | 0.80               | 60   | 3.36                        | 0.90               | 66   | 7.12                        | 1.91               | 75   | 11.87                       | 3.18               |
| Argentina     | 9    | 46.43                       | 30.46              | 5    | 157.92                      | 103.82             | 6    | 190.72                      | 125.40             | 6    | 516.58                      | 339.81             | 6    | 927.96                      | 610.49             |
| Aruba         | 96   | 0.05                        | 0.01               | 109  | 0.08                        | 0.02               | 111  | 0.09                        | 0.02               | 123  | 0.19                        | 0.04               | 132  | 0.32                        | 0.07               |
| Australia     | 142  | -4.97                       | -1.09              | 19   | 41.88                       | 9.08               | 18   | 55.67                       | 12.07              | 20   | 192.60                      | 41.79              | 20   | 365.48                      | 79.31              |
| Bahamas       | 32   | 9.05                        | 1.15               | 38   | 16.26                       | 2.07               | 40   | 18.38                       | 2.34               | 48   | 39.44                       | 5.02               | 52   | 66.04                       | 8.40               |
| Bahrain       | 41   | 2.83                        | 1.00               | 51   | 4.99                        | 1.76               | 54   | 5.62                        | 1.99               | 58   | 11.91                       | 4.21               | 66   | 19.84                       | 7.02               |
| Bangladesh    | 29   | 9.69                        | 4.78               | 35   | 17.05                       | 8.41               | 38   | 19.21                       | 9.48               | 45   | 40.71                       | 20.09              | 50   | 67.86                       | 33.48              |
| Barbados      | 128  | -1.31                       | -1.73              | 139  | -1.29                       | -1.69              | 141  | -1.28                       | -1.68              | 153  | -1.20                       | -1.58              | 159  | -1.11                       | -1.46              |
| Belgium       | 24   | 11.78                       | 2.53               | 31   | 20.72                       | 4.45               | 35   | 23.35                       | 5.01               | 41   | 49.49                       | 10.62              | 46   | 82.48                       | 17.70              |
| Belize        | 143  | -6.73                       | -4.99              | 151  | -6.12                       | -4.54              | 152  | -5.94                       | -4.41              | 158  | -4.15                       | -3.08              | 160  | -1.90                       | -1.41              |
| Benin         | 126  | -0.85                       | -0.81              | 134  | -0.49                       | -0.47              | 136  | -0.38                       | -0.37              | 114  | 0.67                        | 0.64               | 111  | 2.01                        | 1.91               |
| Bermuda       | 127  | -1.07                       | -0.16              | 136  | -1.02                       | -0.15              | 139  | -1.01                       | -0.15              | 150  | -0.88                       | -0.13              | 157  | -0.73                       | -0.11              |
| Bosnia Herzg  | 105  | 0.00                        | 0.00               | 118  | 0.00                        | 0.00               | 121  | 0.00                        | 0.00               | 133  | 0.01                        | 0.00               | 142  | 0.01                        | 0.00               |
| Br Ind Oc Tr  | 108  | 0.00                        | 0.00               | 121  | 0.00                        | 0.00               | 124  | 0.00                        | 0.00               | 136  | 0.00                        | 0.00               | 146  | 0.00                        | 0.00               |
| Br Virgin Is  | 91   | 0.13                        | 0.02               | 103  | 0.23                        | 0.04               | 107  | 0.26                        | 0.04               | 118  | 0.55                        | 0.09               | 127  | 0.92                        | 0.16               |
| Brazil        | 168  | -44.00                      | -23.82             | 165  | -19.08                      | -10.33             | 158  | -11.74                      | -6.36              | 38   | 61.10                       | 33.08              | 36   | 153.07                      | 82.86              |
| Brunei Darism | 92   | 0.12                        | 0.05               | 104  | 0.21                        | 0.08               | 108  | 0.24                        | 0.09               | 119  | 0.51                        | 0.20               | 128  | 0.85                        | 0.33               |
| Bulgaria      | 101  | 0.01                        | 0.01               | 114  | 0.01                        | 0.01               | 117  | 0.01                        | 0.01               | 128  | 0.03                        | 0.03               | 137  | 0.05                        | 0.05               |
| Cambodia      | 38   | 3.23                        | 2.28               | 47   | 5.68                        | 4.01               | 50   | 6.40                        | 4.51               | 55   | 13.56                       | 9.56               | 62   | 22.60                       | 15.94              |
| Cameroon      | 64   | 0.64                        | 0.97               | 75   | 1.28                        | 1.95               | 77   | 1.47                        | 2.24               | 84   | 3.36                        | 5.10               | 93   | 5.73                        | 8.71               |
| Canada        | 11   | 42.29                       | 38.57              | 11   | 128.10                      | 116.85             | 9    | 153.35                      | 139.89             | 9    | 404.17                      | 368.68             | 11   | 720.81                      | 657.53             |
| Cape Verde    | 135  | -3.23                       | -2.73              | 145  | -2.64                       | -2.23              | 147  | -2.47                       | -2.09              | 148  | -0.76                       | -0.64              | 119  | 1.41                        | 1.19               |
| Cayman Is     | 109  | 0.00                        | 0.00               | 122  | 0.00                        | 0.00               | 125  | 0.00                        | 0.00               | 137  | 0.00                        | 0.00               | 147  | 0.00                        | 0.00               |
| Chile         | 188  | -594.62                     | -842.03            | 189  | -516.38                     | -731.23            | 189  | -493.36                     | -698.63            | 190  | -264.68                     | -374.81            | 59   | 24.01                       | 34.00              |
| China Main    | 186  | -303.07                     | -215.86            | 7    | 154.90                      | 110.33             | 4    | 289.66                      | 206.30             | 2    | 1628.21                     | 1159.65            | 3    | 3318.09                     | 2363.21            |
| Colombia      | 166  | -36.25                      | -26.10             | 172  | -32.77                      | -23.59             | 173  | -31.75                      | -22.85             | 178  | -21.57                      | -15.53             | 172  | -8.73                       | -6.28              |
| Comoros       | 151  | -13.73                      | -10.48             | 158  | -13.58                      | -10.37             | 160  | -13.54                      | -10.33             | 167  | -13.10                      | -10.00             | 176  | -12.54                      | -9.57              |
| Congo Dem Rep | 86   | 0.16                        | 0.36               | 96   | 0.34                        | 0.77               | 99   | 0.40                        | 0.89               | 107  | 0.93                        | 2.09               | 115  | 1.59                        | 3.59               |
| Congo Rep     | 95   | 0.07                        | 0.04               | 72   | 1.44                        | 0.87               | 72   | 1.84                        | 1.12               | 72   | 5.84                        | 3.54               | 78   | 10.88                       | 6.59               |

|               |     |         |         |     |         |         |     |         |         |     |         |         |     |         |         |
|---------------|-----|---------|---------|-----|---------|---------|-----|---------|---------|-----|---------|---------|-----|---------|---------|
| Cook Is.      | 144 | -6.91   | -2.30   | 153 | -6.83   | -2.28   | 154 | -6.81   | -2.27   | 163 | -6.58   | -2.19   | 169 | -6.30   | -2.10   |
| Costa Rica    | 158 | -18.97  | -13.92  | 164 | -18.10  | -13.28  | 165 | -17.85  | -13.09  | 171 | -15.30  | -11.23  | 175 | -12.09  | -8.87   |
| Cote d'Ivoire | 125 | -0.85   | -1.15   | 105 | 0.19    | 0.25    | 94  | 0.49    | 0.67    | 81  | 3.51    | 4.77    | 84  | 7.33    | 9.95    |
| Croatia       | 42  | 2.53    | 2.23    | 52  | 4.44    | 3.92    | 56  | 5.01    | 4.41    | 61  | 10.61   | 9.35    | 68  | 17.69   | 15.58   |
| Cuba          | 141 | -4.45   | -2.44   | 143 | -1.71   | -0.94   | 138 | -0.91   | -0.50   | 67  | 7.09    | 3.89    | 71  | 17.19   | 9.42    |
| Cyprus        | 72  | 0.32    | 0.26    | 80  | 1.06    | 0.86    | 81  | 1.27    | 1.03    | 83  | 3.42    | 2.78    | 92  | 6.14    | 4.99    |
| Denmark       | 7   | 72.16   | 85.93   | 10  | 130.45  | 155.34  | 11  | 147.59  | 175.76  | 13  | 317.95  | 378.63  | 15  | 533.01  | 634.74  |
| Djibouti      | 99  | 0.02    | 0.02    | 112 | 0.04    | 0.03    | 115 | 0.04    | 0.03    | 126 | 0.09    | 0.06    | 135 | 0.15    | 0.11    |
| Dominica      | 90  | 0.13    | 0.06    | 102 | 0.23    | 0.10    | 106 | 0.26    | 0.12    | 117 | 0.56    | 0.25    | 126 | 0.93    | 0.42    |
| Dominican Rp  | 52  | 1.28    | 0.66    | 64  | 2.24    | 1.17    | 67  | 2.53    | 1.31    | 74  | 5.36    | 2.78    | 81  | 8.93    | 4.64    |
| Ecuador       | 185 | -224.75 | -220.93 | 186 | -216.89 | -213.21 | 186 | -214.58 | -210.93 | 189 | -191.61 | -188.36 | 191 | -162.61 | -159.85 |
| Egypt         | 46  | 1.80    | 1.80    | 44  | 6.93    | 6.96    | 46  | 8.45    | 8.48    | 51  | 23.47   | 23.55   | 54  | 42.43   | 42.59   |
| El Salvador   | 157 | -18.56  | -13.58  | 163 | -18.06  | -13.21  | 166 | -17.91  | -13.10  | 172 | -16.44  | -12.03  | 179 | -14.59  | -10.67  |
| Eq Guinea     | 87  | 0.16    | 0.30    | 100 | 0.28    | 0.53    | 103 | 0.32    | 0.60    | 115 | 0.67    | 1.28    | 123 | 1.12    | 2.13    |
| Eritrea       | 76  | 0.28    | 0.30    | 90  | 0.49    | 0.53    | 92  | 0.56    | 0.60    | 103 | 1.18    | 1.27    | 112 | 1.96    | 2.12    |
| Estonia       | 133 | -2.40   | -8.06   | 142 | -1.58   | -5.29   | 143 | -1.34   | -4.48   | 105 | 1.07    | 3.60    | 101 | 4.10    | 13.81   |
| Faeroe Is     | 82  | 0.19    | 0.30    | 27  | 29.95   | 45.42   | 25  | 38.71   | 58.70   | 26  | 125.69  | 190.60  | 25  | 235.50  | 357.12  |
| Falkland Is   | 148 | -10.61  | -2.04   | 32  | 19.71   | 3.78    | 32  | 28.63   | 5.49    | 27  | 117.24  | 22.49   | 27  | 229.11  | 43.94   |
| Fiji          | 159 | -20.83  | -9.93   | 166 | -20.07  | -9.56   | 167 | -19.85  | -9.46   | 174 | -17.62  | -8.40   | 180 | -14.81  | -7.06   |
| Finland       | 43  | 2.48    | 9.56    | 53  | 4.37    | 16.82   | 57  | 4.92    | 18.95   | 62  | 10.43   | 40.16   | 70  | 17.39   | 66.94   |
| Fr Guiana     | 50  | 1.46    | 0.37    | 61  | 2.56    | 0.65    | 64  | 2.89    | 0.73    | 71  | 6.12    | 1.55    | 79  | 10.20   | 2.58    |
| Fr Polynesia  | 160 | -20.92  | -6.86   | 167 | -20.41  | -6.69   | 168 | -20.26  | -6.64   | 176 | -18.77  | -6.16   | 182 | -16.89  | -5.54   |
| France        | 183 | -159.57 | -52.87  | 176 | -54.75  | -18.14  | 170 | -23.90  | -7.92   | 15  | 282.48  | 93.59   | 12  | 669.28  | 221.73  |
| Gabon         | 54  | 1.14    | 0.62    | 62  | 2.55    | 1.39    | 63  | 2.97    | 1.61    | 68  | 7.09    | 3.85    | 73  | 12.29   | 6.67    |
| Gambia        | 69  | 0.45    | 0.58    | 76  | 1.17    | 1.52    | 78  | 1.38    | 1.80    | 82  | 3.49    | 4.55    | 91  | 6.15    | 8.02    |
| Gaza Strip    | 77  | 0.26    | 0.17    | 91  | 0.45    | 0.30    | 93  | 0.51    | 0.33    | 104 | 1.08    | 0.71    | 113 | 1.80    | 1.18    |
| Georgia       | 98  | 0.04    | 0.03    | 111 | 0.07    | 0.05    | 113 | 0.07    | 0.06    | 125 | 0.16    | 0.13    | 134 | 0.26    | 0.21    |
| Germany       | 21  | 17.13   | 18.15   | 23  | 34.51   | 36.58   | 23  | 39.63   | 42.00   | 33  | 90.44   | 95.84   | 35  | 154.58  | 163.81  |
| Ghana         | 167 | -37.85  | -46.99  | 171 | -29.13  | -36.16  | 172 | -26.56  | -32.98  | 152 | -1.07   | -1.33   | 57  | 31.12   | 38.63   |
| Gibraltar     | 80  | 0.22    | 0.04    | 94  | 0.38    | 0.06    | 97  | 0.43    | 0.07    | 109 | 0.91    | 0.15    | 117 | 1.52    | 0.26    |
| Greece        | 14  | 32.93   | 8.36    | 15  | 57.93   | 14.71   | 16  | 65.29   | 16.58   | 24  | 138.36  | 35.13   | 26  | 230.60  | 58.55   |
| Greenland     | 15  | 25.76   | 20.21   | 17  | 51.02   | 40.04   | 17  | 58.45   | 45.88   | 25  | 132.29  | 103.83  | 28  | 225.51  | 176.99  |
| Grenada       | 129 | -1.43   | -1.06   | 140 | -1.32   | -0.98   | 142 | -1.29   | -0.96   | 151 | -0.99   | -0.74   | 155 | -0.60   | -0.45   |
| Guadeloupe    | 55  | 1.02    | 0.34    | 67  | 1.79    | 0.60    | 70  | 2.01    | 0.68    | 76  | 4.27    | 1.43    | 85  | 7.11    | 2.39    |
| Guam          | 2   | 213.46  | 38.80   | 2   | 376.21  | 68.39   | 2   | 424.10  | 77.10   | 4   | 899.79  | 163.57  | 4   | 1500.34 | 272.74  |
| Guatemala     | 153 | -14.76  | -13.30  | 160 | -14.54  | -13.10  | 162 | -14.47  | -13.04  | 169 | -13.80  | -12.43  | 177 | -12.96  | -11.67  |
| Guinea        | 71  | 0.35    | 0.57    | 86  | 0.63    | 1.02    | 88  | 0.71    | 1.16    | 98  | 1.52    | 2.47    | 107 | 2.54    | 4.13    |
| GuineaBissau  | 78  | 0.25    | 0.23    | 92  | 0.43    | 0.41    | 95  | 0.49    | 0.47    | 106 | 1.04    | 0.99    | 114 | 1.73    | 1.66    |
| Guyana        | 75  | 0.30    | 0.20    | 89  | 0.53    | 0.36    | 91  | 0.60    | 0.40    | 102 | 1.27    | 0.85    | 110 | 2.12    | 1.42    |
| Haiti         | 62  | 0.66    | 0.27    | 77  | 1.16    | 0.47    | 79  | 1.30    | 0.53    | 86  | 2.76    | 1.12    | 96  | 4.60    | 1.86    |
| Honduras      | 150 | -12.69  | -7.79   | 157 | -12.35  | -7.58   | 159 | -12.25  | -7.52   | 166 | -11.24  | -6.90   | 174 | -9.97   | -6.12   |
| Hong Kong     | 173 | -70.23  | -19.34  | 178 | -62.60  | -17.24  | 178 | -60.36  | -16.62  | 181 | -38.05  | -10.48  | 173 | -9.89   | -2.73   |
| Iceland       | 10  | 46.02   | 161.73  | 12  | 86.82   | 305.13  | 13  | 98.83   | 347.32  | 19  | 218.08  | 766.43  | 19  | 368.63  | 1295.53 |

|              |     |          |         |     |         |         |     |         |         |     |         |         |     |         |         |
|--------------|-----|----------|---------|-----|---------|---------|-----|---------|---------|-----|---------|---------|-----|---------|---------|
| India        | 4   | 120.27   | 172.60  | 4   | 211.53  | 303.57  | 5   | 238.38  | 342.11  | 7   | 505.12  | 724.92  | 8   | 841.86  | 1208.19 |
| Indonesia    | 180 | -120.32  | -130.69 | 60  | 2.76    | 3.00    | 24  | 38.98   | 42.34   | 10  | 398.71  | 433.07  | 7   | 852.86  | 926.36  |
| Iran         | 176 | -84.43   | -67.43  | 179 | -69.19  | -55.26  | 179 | -64.70  | -51.68  | 177 | -20.16  | -16.10  | 56  | 36.08   | 28.82   |
| Iraq         | 100 | 0.01     | 0.01    | 113 | 0.02    | 0.01    | 116 | 0.02    | 0.01    | 127 | 0.04    | 0.03    | 136 | 0.07    | 0.05    |
| Ireland      | 25  | 11.62    | 10.80   | 24  | 31.52   | 29.29   | 27  | 37.38   | 34.73   | 31  | 95.55   | 88.78   | 30  | 168.99  | 157.02  |
| Israel       | 67  | 0.55     | 0.22    | 82  | 0.96    | 0.38    | 84  | 1.08    | 0.43    | 93  | 2.29    | 0.90    | 102 | 3.82    | 1.51    |
| Italy        | 8   | 59.58    | 8.97    | 9   | 132.90  | 20.01   | 8   | 154.47  | 23.26   | 11  | 368.77  | 55.54   | 13  | 639.32  | 96.28   |
| Jamaica      | 51  | 1.29     | 0.57    | 63  | 2.27    | 1.00    | 66  | 2.56    | 1.13    | 73  | 5.42    | 2.40    | 80  | 9.04    | 4.00    |
| Japan        | 192 | -1424.50 | -511.70 | 190 | -799.68 | -287.26 | 190 | -615.84 | -221.22 | 3   | 1210.32 | 434.76  | 2   | 3515.79 | 1262.91 |
| Jordan       | 73  | 0.32     | 0.11    | 87  | 0.55    | 0.19    | 89  | 0.62    | 0.21    | 100 | 1.32    | 0.45    | 108 | 2.21    | 0.75    |
| Kenya        | 139 | -4.38    | -2.93   | 149 | -4.21   | -2.82   | 150 | -4.15   | -2.78   | 157 | -3.64   | -2.44   | 162 | -3.00   | -2.01   |
| Kerguelen Is | 123 | -0.80    | -0.18   | 135 | -0.79   | -0.18   | 137 | -0.78   | -0.17   | 149 | -0.76   | -0.17   | 156 | -0.73   | -0.16   |
| Kiribati     | 147 | -9.29    | -13.15  | 155 | -8.57   | -12.12  | 156 | -8.36   | -11.82  | 162 | -6.24   | -8.83   | 165 | -3.58   | -5.06   |
| Korea D P Rp | 28  | 10.11    | 11.99   | 34  | 17.79   | 21.08   | 37  | 20.04   | 23.76   | 44  | 42.47   | 50.34   | 49  | 70.79   | 83.90   |
| Korea Rep    | 191 | -1053.66 | -548.13 | 192 | -931.81 | -484.69 | 192 | -895.95 | -466.02 | 191 | -539.82 | -280.61 | 188 | -90.22  | -46.54  |
| Kuwait       | 56  | 0.99     | 0.31    | 68  | 1.74    | 0.55    | 71  | 1.96    | 0.62    | 77  | 4.15    | 1.32    | 86  | 6.91    | 2.20    |
| Latvia       | 44  | 2.30     | 5.77    | 50  | 5.04    | 12.65   | 53  | 5.85    | 14.68   | 53  | 13.87   | 34.78   | 60  | 23.98   | 60.16   |
| Lebanon      | 63  | 0.65     | 0.47    | 78  | 1.14    | 0.83    | 80  | 1.29    | 0.93    | 88  | 2.73    | 1.97    | 97  | 4.55    | 3.29    |
| Liberia      | 121 | -0.56    | -0.41   | 131 | -0.09   | -0.06   | 114 | 0.05    | 0.04    | 99  | 1.42    | 1.05    | 105 | 3.16    | 2.32    |
| Libya        | 49  | 1.55     | 1.98    | 59  | 2.83    | 3.63    | 62  | 3.21    | 4.11    | 69  | 6.97    | 8.93    | 76  | 11.72   | 15.00   |
| Lithuania    | 35  | 4.21     | 9.91    | 43  | 9.33    | 21.98   | 45  | 10.84   | 25.53   | 49  | 25.82   | 60.79   | 53  | 44.72   | 105.30  |
| Macau        | 66  | 0.59     | 0.19    | 81  | 1.04    | 0.34    | 83  | 1.17    | 0.38    | 91  | 2.47    | 0.80    | 100 | 4.12    | 1.34    |
| Madagascar   | 37  | 3.28     | 1.49    | 46  | 5.77    | 2.63    | 49  | 6.50    | 2.96    | 54  | 13.77   | 6.27    | 61  | 22.95   | 10.45   |
| Malaysia     | 184 | -181.74  | -120.23 | 184 | -138.14 | -91.39  | 184 | -125.31 | -82.90  | 95  | 2.12    | 1.40    | 33  | 163.00  | 107.83  |
| Maldives     | 19  | 17.63    | 16.34   | 25  | 31.01   | 28.73   | 28  | 34.94   | 32.38   | 34  | 74.04   | 68.61   | 38  | 123.40  | 114.36  |
| Malta        | 57  | 0.90     | 0.13    | 69  | 1.58    | 0.23    | 73  | 1.79    | 0.26    | 78  | 3.78    | 0.54    | 88  | 6.30    | 0.90    |
| Marshall Is  | 138 | -4.26    | -7.50   | 146 | -2.66   | -4.69   | 146 | -2.19   | -3.86   | 90  | 2.48    | 4.36    | 83  | 8.38    | 14.74   |
| Martinique   | 59  | 0.88     | 0.62    | 71  | 1.55    | 1.09    | 75  | 1.74    | 1.23    | 80  | 3.69    | 2.61    | 90  | 6.16    | 4.35    |
| Mauritania   | 33  | 5.73     | 10.15   | 41  | 10.14   | 17.98   | 43  | 11.44   | 20.29   | 50  | 24.35   | 43.18   | 55  | 40.65   | 72.08   |
| Mauritius    | 58  | 0.89     | 0.37    | 70  | 1.56    | 0.65    | 74  | 1.76    | 0.73    | 79  | 3.72    | 1.55    | 89  | 6.20    | 2.58    |
| Mayotte      | 60  | 0.78     | 0.36    | 74  | 1.37    | 0.64    | 76  | 1.54    | 0.72    | 85  | 3.26    | 1.52    | 94  | 5.44    | 2.54    |
| Mexico       | 187 | -334.00  | -175.65 | 187 | -297.58 | -156.49 | 187 | -286.86 | -150.85 | 188 | -180.39 | -94.86  | 186 | -45.98  | -24.18  |
| Micronesia   | 137 | -3.70    | -3.06   | 144 | -2.36   | -1.95   | 145 | -1.96   | -1.63   | 96  | 1.95    | 1.61    | 87  | 6.89    | 5.70    |
| Monaco       | 110 | 0.00     | 0.00    | 123 | 0.00    | 0.00    | 126 | 0.00    | 0.00    | 138 | 0.00    | 0.00    | 148 | 0.00    | 0.00    |
| Montserrat   | 111 | 0.00     | 0.00    | 124 | 0.00    | 0.00    | 127 | 0.00    | 0.00    | 139 | 0.00    | 0.00    | 149 | 0.00    | 0.00    |
| Morocco      | 5   | 75.70    | 96.13   | 8   | 133.14  | 169.08  | 10  | 150.04  | 190.54  | 14  | 317.92  | 403.75  | 16  | 529.87  | 672.92  |
| Mozambique   | 122 | -0.70    | -0.26   | 66  | 2.05    | 0.74    | 65  | 2.86    | 1.04    | 59  | 10.90   | 3.96    | 65  | 21.06   | 7.65    |
| Myanmar      | 36  | 3.85     | 2.35    | 45  | 6.77    | 4.14    | 47  | 7.63    | 4.66    | 52  | 16.16   | 9.87    | 58  | 26.93   | 16.46   |
| N Marianas   | 118 | -0.13    | -0.05   | 130 | -0.04   | -0.01   | 131 | -0.01   | 0.00    | 122 | 0.28    | 0.10    | 130 | 0.64    | 0.24    |
| Namibia      | 161 | -21.84   | -37.33  | 137 | -1.05   | -1.80   | 55  | 5.07    | 8.66    | 37  | 65.83   | 112.52  | 37  | 142.53  | 243.64  |
| Nauru        | 115 | -0.02    | -0.01   | 129 | -0.01   | -0.01   | 133 | -0.01   | -0.01   | 143 | -0.01   | 0.00    | 143 | 0.00    | 0.00    |
| NethAntilles | 162 | -23.53   | -9.16   | 168 | -23.53  | -9.16   | 169 | -23.53  | -9.16   | 179 | -23.52  | -9.16   | 183 | -23.52  | -9.16   |
| Netherlands  | 13  | 37.18    | 30.77   | 13  | 84.85   | 70.21   | 12  | 98.87   | 81.81   | 18  | 238.18  | 197.08  | 18  | 414.05  | 342.60  |

|                      |     |         |         |     |         |         |     |         |         |     |         |         |     |         |         |
|----------------------|-----|---------|---------|-----|---------|---------|-----|---------|---------|-----|---------|---------|-----|---------|---------|
| New Caledonia        | 53  | 1.21    | 0.35    | 65  | 2.13    | 0.62    | 68  | 2.40    | 0.70    | 75  | 5.08    | 1.48    | 82  | 8.47    | 2.47    |
| New Zealand          | 155 | -16.91  | -9.38   | 16  | 51.63   | 26.54   | 15  | 71.80   | 37.11   | 16  | 272.13  | 142.09  | 17  | 525.03  | 274.63  |
| Nicaragua            | 156 | -18.56  | -8.56   | 162 | -15.88  | -7.33   | 163 | -15.09  | -6.96   | 164 | -7.24   | -3.34   | 106 | 2.66    | 1.23    |
| Nigeria              | 18  | 22.02   | 20.83   | 22  | 39.46   | 37.33   | 22  | 44.59   | 42.18   | 30  | 95.56   | 90.39   | 34  | 159.90  | 151.26  |
| Niue                 | 119 | -0.29   | -0.11   | 133 | -0.29   | -0.11   | 135 | -0.29   | -0.11   | 147 | -0.29   | -0.11   | 154 | -0.29   | -0.11   |
| Norfolk I.           | 112 | 0.00    | 0.00    | 125 | 0.00    | 0.00    | 128 | 0.00    | 0.00    | 140 | 0.00    | 0.00    | 150 | 0.00    | 0.00    |
| Norway               | 31  | 9.39    | 59.44   | 20  | 40.93   | 258.45  | 19  | 50.21   | 317.01  | 23  | 142.38  | 898.68  | 24  | 258.74  | 1633.02 |
| Oman                 | 20  | 17.44   | 9.01    | 26  | 30.68   | 15.85   | 29  | 34.57   | 17.86   | 35  | 73.25   | 37.84   | 39  | 122.09  | 63.07   |
| Other nei            | 174 | -78.00  | -37.65  | 177 | -57.19  | -27.60  | 177 | -51.07  | -24.65  | 64  | 9.77    | 4.71    | 45  | 86.57   | 41.78   |
| Pakistan             | 170 | -52.15  | -60.44  | 173 | -44.05  | -51.05  | 174 | -41.67  | -48.29  | 175 | -18.00  | -20.86  | 74  | 11.88   | 13.77   |
| Palau                | 116 | -0.02   | -0.01   | 128 | -0.01   | -0.01   | 132 | -0.01   | -0.01   | 130 | 0.01    | 0.01    | 139 | 0.04    | 0.02    |
| Panama               | 182 | -158.39 | -83.54  | 185 | -153.30 | -80.85  | 185 | -151.80 | -80.06  | 187 | -136.90 | -72.21  | 190 | -118.09 | -62.28  |
| Papua N Guin         | 22  | 16.70   | 22.85   | 28  | 29.37   | 40.18   | 30  | 33.10   | 45.29   | 36  | 70.14   | 95.96   | 40  | 116.90  | 159.93  |
| Peru                 | 164 | -26.81  | -36.60  | 36  | 16.93   | 23.11   | 31  | 29.79   | 40.68   | 22  | 157.62  | 215.20  | 22  | 318.99  | 435.53  |
| Philippines          | 181 | -150.64 | -158.60 | 170 | -28.90  | -30.43  | 48  | 6.92    | 7.29    | 12  | 362.74  | 381.91  | 9   | 811.94  | 854.85  |
| Pitcairn Is          | 113 | 0.00    | 0.00    | 126 | 0.00    | 0.00    | 129 | 0.00    | 0.00    | 141 | 0.00    | 0.00    | 151 | 0.00    | 0.00    |
| Poland               | 61  | 0.69    | 1.84    | 55  | 3.10    | 8.23    | 59  | 3.81    | 10.11   | 60  | 10.84   | 28.78   | 67  | 19.72   | 52.36   |
| Portugal             | 163 | -25.34  | -13.56  | 56  | 3.04    | 1.63    | 44  | 11.39   | 6.10    | 32  | 94.32   | 50.48   | 29  | 199.02  | 106.52  |
| Puerto Rico          | 88  | 0.15    | 0.04    | 85  | 0.77    | 0.21    | 87  | 0.95    | 0.26    | 87  | 2.74    | 0.75    | 95  | 4.99    | 1.37    |
| Qatar                | 48  | 1.64    | 0.52    | 58  | 2.89    | 0.91    | 61  | 3.26    | 1.02    | 70  | 6.90    | 2.17    | 77  | 11.50   | 3.61    |
| Reunion              | 154 | -15.49  | -3.18   | 161 | -15.44  | -3.17   | 164 | -15.42  | -3.17   | 170 | -15.27  | -3.14   | 181 | -15.08  | -3.10   |
| Romania              | 103 | 0.00    | 0.00    | 116 | 0.00    | 0.01    | 119 | 0.00    | 0.01    | 131 | 0.01    | 0.02    | 140 | 0.01    | 0.03    |
| Russian Fed          | 6   | 72.51   | 224.95  | 6   | 156.69  | 486.06  | 7   | 181.46  | 562.89  | 8   | 427.50  | 1326.05 | 10  | 738.11  | 2289.52 |
| Samoa                | 140 | -4.42   | -4.12   | 150 | -4.40   | -4.10   | 151 | -4.39   | -4.09   | 159 | -4.33   | -4.03   | 167 | -4.25   | -3.96   |
| Sao Tome Prn         | 65  | 0.60    | 0.46    | 79  | 1.06    | 0.81    | 82  | 1.20    | 0.91    | 89  | 2.54    | 1.94    | 98  | 4.23    | 3.23    |
| Saudi Arabia         | 34  | 4.50    | 1.32    | 40  | 13.05   | 3.84    | 41  | 15.56   | 4.58    | 46  | 40.55   | 11.93   | 48  | 72.09   | 21.20   |
| Senegal              | 26  | 11.09   | 14.83   | 30  | 22.64   | 30.27   | 34  | 26.04   | 34.81   | 39  | 59.79   | 79.94   | 41  | 102.41  | 136.91  |
| Serbia<br>Montenegro | 97  | 0.04    | 0.03    | 110 | 0.07    | 0.06    | 112 | 0.08    | 0.06    | 124 | 0.16    | 0.13    | 133 | 0.27    | 0.22    |
| Seychelles           | 178 | -104.59 | -68.97  | 183 | -102.99 | -67.91  | 183 | -102.52 | -67.60  | 185 | -97.83  | -64.51  | 189 | -91.91  | -60.60  |
| Sierra Leone         | 124 | -0.84   | -0.92   | 73  | 1.41    | 1.54    | 69  | 2.08    | 2.26    | 65  | 8.67    | 9.45    | 72  | 16.99   | 18.52   |
| Singapore            | 134 | -3.06   | -1.18   | 147 | -2.96   | -1.14   | 148 | -2.94   | -1.13   | 155 | -2.67   | -1.03   | 161 | -2.33   | -0.90   |
| Slovenia             | 89  | 0.15    | 0.09    | 101 | 0.26    | 0.16    | 105 | 0.30    | 0.18    | 116 | 0.63    | 0.37    | 124 | 1.04    | 0.62    |
| Solomon Is.          | 39  | 3.05    | 3.01    | 48  | 5.37    | 5.29    | 51  | 6.05    | 5.96    | 56  | 12.81   | 12.63   | 63  | 21.36   | 21.05   |
| Somalia              | 93  | 0.10    | 0.07    | 106 | 0.17    | 0.12    | 109 | 0.19    | 0.14    | 120 | 0.41    | 0.29    | 129 | 0.69    | 0.49    |
| South Africa         | 132 | -2.07   | -2.85   | 42  | 10.06   | 13.83   | 42  | 13.63   | 18.74   | 42  | 49.09   | 67.49   | 43  | 93.86   | 129.05  |
| Spain                | 189 | -616.89 | -239.18 | 188 | -497.07 | -192.74 | 188 | -461.81 | -179.08 | 186 | -111.59 | -43.34  | 21  | 330.54  | 128.02  |
| Sri Lanka            | 175 | -81.76  | -111.09 | 180 | -76.09  | -103.39 | 180 | -74.42  | -101.13 | 183 | -57.86  | -78.63  | 184 | -36.96  | -50.22  |
| St Helena            | 136 | -3.46   | -0.88   | 148 | -3.44   | -0.88   | 149 | -3.44   | -0.88   | 156 | -3.41   | -0.87   | 163 | -3.37   | -0.86   |
| St Kitts Nev         | 84  | 0.18    | 0.04    | 98  | 0.32    | 0.07    | 101 | 0.37    | 0.08    | 112 | 0.78    | 0.17    | 121 | 1.29    | 0.28    |
| St Lucia             | 79  | 0.22    | 0.15    | 93  | 0.39    | 0.26    | 96  | 0.43    | 0.29    | 108 | 0.92    | 0.62    | 116 | 1.53    | 1.04    |
| St Pier Mq           | 70  | 0.42    | 0.32    | 83  | 0.90    | 0.69    | 85  | 1.04    | 0.79    | 92  | 2.44    | 1.86    | 99  | 4.21    | 3.20    |
| St Vincent           | 146 | -7.75   | -4.23   | 154 | -7.30   | -3.98   | 155 | -7.16   | -3.90   | 161 | -5.82   | -3.17   | 166 | -4.13   | -2.25   |

|                |            |                 |                 |            |                 |             |            |             |                |            |                 |                 |            |                 |                 |
|----------------|------------|-----------------|-----------------|------------|-----------------|-------------|------------|-------------|----------------|------------|-----------------|-----------------|------------|-----------------|-----------------|
| Sudan          | 102        | 0.01            | 0.01            | 115        | 0.01            | 0.02        | 118        | 0.01        | 0.02           | 129        | 0.03            | 0.04            | 138        | 0.04            | 0.06            |
| Suriname       | 85         | 0.17            | 0.10            | 99         | 0.30            | 0.18        | 102        | 0.33        | 0.21           | 113        | 0.71            | 0.44            | 122        | 1.18            | 0.73            |
| Svalbard Is    | 114        | 0.00            | 0.00            | 127        | 0.00            | 0.00        | 130        | 0.00        | 0.00           | 142        | 0.00            | 0.00            | 152        | 0.00            | 0.00            |
| Sweden         | 45         | 2.19            | 17.98           | 54         | 4.11            | 33.85       | 58         | 4.68        | 38.52          | 63         | 10.32           | 84.90           | 69         | 17.43           | 143.45          |
| Syria          | 68         | 0.51            | 0.35            | 84         | 0.90            | 0.62        | 86         | 1.01        | 0.70           | 94         | 2.15            | 1.48            | 103        | 3.58            | 2.47            |
| Taiwan         | 190        | -870.24         | -559.67         | 191        | -837.48         | -538.61     | 191        | -827.84     | -532.41        | 192        | -732.11         | -470.84         | 192        | -611.26         | -393.12         |
| Tanzania       | 149        | -11.05          | -12.85          | 156        | -10.51          | -12.22      | 157        | -10.35      | -12.03         | 165        | -8.75           | -10.17          | 170        | -6.73           | -7.83           |
| Thailand       | 172        | -61.11          | -63.44          | 39         | 15.50           | 16.10       | 26         | 38.05       | 39.50          | 17         | 261.98          | 271.97          | 14         | 544.70          | 565.46          |
| Timor Leste    | 104        | 0.00            | 0.00            | 117        | 0.00            | 0.00        | 120        | 0.00        | 0.00           | 132        | 0.01            | 0.01            | 141        | 0.01            | 0.01            |
| Togo           | 131        | -1.56           | -2.49           | 138        | -1.23           | -1.97       | 140        | -1.14       | -1.82          | 146        | -0.19           | -0.30           | 125        | 1.01            | 1.61            |
| Tokelau        | 117        | -0.11           | -0.05           | 132        | -0.11           | -0.05       | 134        | -0.11       | -0.05          | 145        | -0.11           | -0.05           | 153        | -0.11           | -0.05           |
| Tonga          | 130        | -1.48           | -1.29           | 141        | -1.42           | -1.24       | 144        | -1.41       | -1.22          | 154        | -1.23           | -1.07           | 158        | -1.01           | -0.88           |
| Trinidad Tob   | 145        | -7.05           | -3.76           | 152        | -6.59           | -3.51       | 153        | -6.45       | -3.44          | 160        | -5.09           | -2.72           | 164        | -3.38           | -1.80           |
| Tunisia        | 27         | 10.33           | 8.52            | 33         | 18.17           | 14.99       | 36         | 20.47       | 16.89          | 43         | 43.38           | 35.79           | 47         | 72.30           | 59.64           |
| Turkey         | 16         | 24.14           | 14.54           | 18         | 42.46           | 25.58       | 20         | 47.84       | 28.82          | 28         | 101.38          | 61.07           | 31         | 168.97          | 101.79          |
| Turks Caicos   | 40         | 3.02            | 0.66            | 49         | 5.31            | 1.17        | 52         | 5.98        | 1.31           | 57         | 12.68           | 2.79            | 64         | 21.14           | 4.65            |
| Tuvalu         | 81         | 0.21            | 0.20            | 95         | 0.36            | 0.35        | 98         | 0.41        | 0.40           | 110        | 0.86            | 0.84            | 118        | 1.44            | 1.40            |
| UK             | 3          | 141.07          | 48.93           | 3          | 280.52          | 97.37       | 3          | 321.55      | 111.63         | 5          | 729.14          | 253.21          | 5          | 1243.70         | 431.95          |
| Ukraine        | 165        | -29.81          | -72.40          | 169        | -26.80          | -65.11      | 171        | -25.92      | -62.97         | 173        | -17.14          | -41.65          | 168        | -6.05           | -14.74          |
| Untd Arab Em   | 23         | 13.26           | 5.93            | 29         | 23.32           | 10.43       | 33         | 26.29       | 11.75          | 40         | 55.70           | 24.90           | 44         | 92.83           | 41.50           |
| Uruguay        | 171        | -57.48          | -33.05          | 175        | -51.19          | -29.45      | 176        | -49.33      | -28.39         | 180        | -30.93          | -17.84          | 171        | -7.69           | -4.53           |
| US (Alaska)    | 83         | 0.19            | 0.09            | 97         | 0.33            | 0.16        | 100        | 0.38        | 0.18           | 111        | 0.81            | 0.39            | 120        | 1.35            | 0.64            |
| US Virgin Is   | 120        | -0.33           | -0.06           | 107        | 0.16            | 0.03        | 104        | 0.30        | 0.06           | 97         | 1.73            | 0.33            | 104        | 3.53            | 0.68            |
| USA            | 1          | 501.04          | 258.41          | 1          | 1201.58         | 619.74      | 1          | 1407.70     | 726.05         | 1          | 3455.22         | 1782.12         | 1          | 6040.13         | 3115.36         |
| Vanuatu        | 169        | -48.66          | -68.53          | 174        | -48.02          | -67.62      | 175        | -47.83      | -67.35         | 182        | -45.95          | -64.71          | 185        | -43.58          | -61.37          |
| Venezuela      | 179        | -107.56         | -70.78          | 181        | -82.07          | -54.01      | 181        | -74.57      | -49.08         | 144        | -0.09           | -0.06           | 42         | 93.94           | 61.82           |
| Viet Nam       | 12         | 40.97           | 42.63           | 14         | 72.06           | 74.98       | 14         | 81.21       | 84.50          | 21         | 172.08          | 179.05          | 23         | 286.80          | 298.42          |
| Wallis Fut I   | 106        | 0.00            | 0.00            | 119        | 0.00            | 0.00        | 122        | 0.00        | 0.00           | 134        | 0.00            | 0.00            | 144        | 0.00            | 0.00            |
| West Sahara    | 107        | 0.00            | 0.00            | 120        | 0.00            | 0.00        | 123        | 0.00        | 0.00           | 135        | 0.00            | 0.00            | 145        | 0.00            | 0.00            |
| Yemen          | 177        | -102.28         | -92.60          | 182        | -95.49          | -86.46      | 182        | -93.50      | -84.65         | 184        | -73.65          | -66.68          | 187        | -48.59          | -43.99          |
| <b>TOTAL</b>   | <b>192</b> | <b>-5740.34</b> | <b>-3406.55</b> | <b>192</b> | <b>-1305.02</b> | <b>0.00</b> | <b>192</b> | <b>0.00</b> | <b>1002.32</b> | <b>192</b> | <b>12963.32</b> | <b>10958.81</b> | <b>192</b> | <b>29329.02</b> | <b>23528.50</b> |
| <b>Average</b> | 96         | -29.90          | -17.74          | 96         | -6.80           | 0.00        | 96         | 0.00        | 5.22           | 96         | 67.52           | 57.08           | 96         | 152.76          | 122.54          |

**Table 3 | Forecasted average percentage gains and losses in catch quantity and landed value by country group, given three scenarios of increased total straddling stock catch following the closure of high seas areas to fishing (10%, 42%, and 70%). In addition, two other scenarios are considered that result in a balance of global fisheries gains and losses from the closure, i.e., a net gain of | <.0001% | in catch and landed value, (18% and 20%, respectively). Increased straddling stock catch scenarios are based on the range of model outcomes produced by White and Costello<sup>1</sup>. Ranking is given according to the largest gains in total landed value.**

| Country group                                 | 10%                        |                     | 18%                        |                     | 20%                        |                     | 42%                        |                     | 70%                        |                     |
|-----------------------------------------------|----------------------------|---------------------|----------------------------|---------------------|----------------------------|---------------------|----------------------------|---------------------|----------------------------|---------------------|
|                                               | Landed value<br>(% change) | Catch<br>(% change) |
| Average European Union (EU)                   | 2.4                        | 2.6                 | 8.2                        | 8.4                 | 10.0                       | 10.1                | 27.1                       | 26.9                | 48.8                       | 48.2                |
| Average G8 countries                          | 1.3                        | 1.7                 | 7.6                        | 8.3                 | 9.5                        | 10.2                | 28.0                       | 29.3                | 51.4                       | 53.4                |
| Average OECD countries                        | -1.5                       | -0.8                | 4.5                        | 5.1                 | 6.3                        | 6.9                 | 23.8                       | 24.3                | 46.0                       | 46.4                |
| Average Least Developed Countries             | -7.6                       | -7.7                | -2.7                       | -2.6                | -1.3                       | -1.1                | 12.9                       | 13.7                | 30.8                       | 32.5                |
| Average all countries                         | -10.9                      | -10.8               | -6.0                       | -5.8                | -4.5                       | -4.3                | 10.0                       | 10.4                | 28.3                       | 29.1                |
| Average high seas fishing countries           | -17.0                      | -17.4               | -12.4                      | -12.8               | -11.1                      | -11.4               | 2.2                        | 2.0                 | 19.0                       | 19.0                |
| Average Small Island Developing States (SIDS) | -23.2                      | -23.5               | -18.2                      | -18.5               | -16.7                      | -17.0               | -2.1                       | -2.1                | 16.3                       | 16.7                |
| Average Flag of Convenience (FoC) countries   | -26.6                      | -26.3               | -22.3                      | -22.1               | -21.0                      | -20.8               | -8.5                       | -8.3                | 7.3                        | 7.4                 |

**Table 4 | Forecasted average percentage gains and losses in catch quantity and landed value by 'Flag of Convenience (FoC) countries', given three scenarios of increased total straddling stock catch following the closure of high seas areas to fishing (10%, 42%, and 70%). In addition, two other scenarios are considered that result in a balance of global fisheries gains and losses from the closure, i.e., a net gain of | <.0001% | in catch and landed value, (18% and 20%, respectively). Increased straddling stock catch scenarios are based on the range of model outcomes produced by White and Costello<sup>1</sup>. Ranking is given according to the largest gains in total landed value. Listed countries are those that function as an FoC country for over 50% of the fishing vessels that fish under their flag, based on global fishing fleet information provided from Sea-web in January of 2013. When a vessel is flying the flag of a state that does not match the state of vessel owner control or residence, we describe this vessel as flying an FoC.**

| Country        | 10%                        |                     | 18%                        |                     | 20%                        |                     | 42%                        |                     | 70%                        |                     |
|----------------|----------------------------|---------------------|----------------------------|---------------------|----------------------------|---------------------|----------------------------|---------------------|----------------------------|---------------------|
|                | Landed value<br>(% change) | Catch<br>(% change) |
| Bahamas        | 11.0                       | 11.0                | 19.7                       | 19.8                | 22.3                       | 22.3                | 47.8                       | 48.0                | 80.0                       | 80.3                |
| Barbados       | -80.8                      | -80.8               | -79.3                      | -79.3               | -78.8                      | -78.8               | -74.2                      | -74.2               | -68.4                      | -68.4               |
| Belize         | -45.0                      | -44.3               | -40.9                      | -40.3               | -39.7                      | -39.1               | -27.8                      | -27.4               | -12.7                      | -12.5               |
| Cambodia       | 12.1                       | 12.1                | 21.3                       | 21.3                | 24.0                       | 24.0                | 51.0                       | 51.0                | 84.9                       | 84.9                |
| Comoros        | -82.0                      | -83.2               | -81.1                      | -82.3               | -80.8                      | -82.0               | -78.2                      | -79.4               | -74.9                      | -76.0               |
| Cook Is.       | -85.1                      | -86.3               | -84.2                      | -85.3               | -83.9                      | -85.1               | -81.1                      | -82.2               | -77.6                      | -78.6               |
| Dominica       | 12.1                       | 12.1                | 21.3                       | 21.3                | 24.0                       | 24.0                | 51.0                       | 51.0                | 84.9                       | 84.9                |
| Eq. Guinea     | 12.1                       | 12.1                | 21.3                       | 21.3                | 24.0                       | 24.0                | 51.0                       | 51.0                | 84.9                       | 84.9                |
| Faeroe Is.     | 0.0                        | 0.1                 | 7.0                        | 8.1                 | 9.1                        | 10.5                | 29.5                       | 34.1                | 55.2                       | 63.9                |
| Falkland Is.   | -2.8                       | -2.8                | 5.2                        | 5.2                 | 7.5                        | 7.5                 | 30.9                       | 30.9                | 60.3                       | 60.3                |
| Gabon          | 2.6                        | 2.1                 | 5.7                        | 4.8                 | 6.6                        | 5.6                 | 15.8                       | 13.3                | 27.4                       | 23.0                |
| Guinea         | 0.8                        | 1.0                 | 1.3                        | 1.7                 | 1.5                        | 2.0                 | 3.2                        | 4.2                 | 5.4                        | 7.0                 |
| Guinea Bissau  | 6.3                        | 6.9                 | 11.2                       | 12.2                | 12.6                       | 13.7                | 26.8                       | 29.2                | 44.7                       | 48.6                |
| Honduras       | -75.2                      | -75.2               | -73.1                      | -73.2               | -72.5                      | -72.6               | -66.6                      | -66.6               | -59.1                      | -59.1               |
| Kiribati       | -41.6                      | -45.6               | -38.4                      | -42.1               | -37.5                      | -41.0               | -28.0                      | -30.7               | -16.0                      | -17.6               |
| Liberia        | -6.1                       | -6.6                | -0.9                       | -1.0                | 0.6                        | 0.6                 | 15.5                       | 16.8                | 34.3                       | 37.3                |
| Micronesia     | -18.2                      | -18.5               | -11.6                      | -11.8               | -9.7                       | -9.8                | 9.6                        | 9.7                 | 34.0                       | 34.4                |
| Panama         | -52.2                      | -29.5               | -50.5                      | -28.6               | -50.0                      | -28.3               | -45.1                      | -25.5               | -38.9                      | -22.0               |
| Seychelles     | -83.7                      | -83.7               | -82.4                      | -82.5               | -82.1                      | -82.1               | -78.3                      | -78.3               | -73.6                      | -73.6               |
| Sierra Leone   | -1.0                       | -0.8                | 1.6                        | 1.4                 | 2.4                        | 2.1                 | 9.9                        | 8.6                 | 19.5                       | 16.8                |
| St. Helena     | -94.2                      | -95.0               | -93.9                      | -94.7               | -93.9                      | -94.6               | -93.0                      | -93.7               | -91.9                      | -92.7               |
| St. Kitts Nev. | 11.1                       | 10.8                | 19.5                       | 19.0                | 21.9                       | 21.4                | 46.5                       | 45.4                | 77.5                       | 75.7                |
| St. Vincent    | -54.2                      | -53.0               | -51.0                      | -49.9               | -50.1                      | -48.9               | -40.7                      | -39.8               | -28.9                      | -28.2               |
| Suriname       | 3.6                        | 1.0                 | 6.3                        | 1.8                 | 7.1                        | 2.1                 | 15.0                       | 4.4                 | 25.1                       | 7.3                 |
| Tanzania       | -29.3                      | -33.9               | -27.9                      | -32.2               | -27.4                      | -31.8               | -23.2                      | -26.9               | -17.9                      | -20.7               |
| Togo           | -9.7                       | -12.0               | -7.6                       | -9.5                | -7.0                       | -8.8                | -1.2                       | -1.5                | 6.2                        | 7.8                 |
| Tonga          | -67.1                      | -67.1               | -64.4                      | -64.4               | -63.6                      | -63.6               | -55.7                      | -55.7               | -45.7                      | -45.7               |



|                |       |       |       |       |       |       |      |      |      |      |
|----------------|-------|-------|-------|-------|-------|-------|------|------|------|------|
| Tuvalu         | 12.1  | 12.1  | 21.3  | 21.3  | 24.0  | 24.0  | 51.0 | 51.0 | 84.9 | 84.9 |
| <b>Average</b> | -26.6 | -26.3 | -22.3 | -22.1 | -21.0 | -20.8 | -8.5 | -8.3 | 7.3  | 7.4  |

1. White, C. & Costello, C. Close the High Seas to Fishing? PLoS Biol 12, e1001826 (2014).
